# Supplementary material for: Magnetically recoverable silica catalysed solvent-free domino Knoevenagel-hetero-Diels–Alder reaction to access divergent chromenones
Source: Royal Society of Chemistry journal article supplement (doi:10.1039/d0ob00284d), 2020-01-01

## Supporting Information

### **Magnetically recoverable silica catalysed solvent-free domino Knoevenagel-hetero-Diels-Alder reaction to access divergent chromenones**

Mrinaly Suri,<sup>a</sup> Farhaz Liaquat Hussain,<sup>a</sup> Chinu Gogoi,<sup>a</sup> Pankaj Das,<sup>b</sup> Pallab Pahari<sup>a,c\*</sup>

<sup>a</sup>*Applied Organic Chemistry Group, Chemical Science and Technology Division, CSIR-North East Institute of Science and Technology, Jorhat-785006, Assam, India*

<sup>b</sup>*Department of Chemistry, Dibrugarh University, Dibrugarh-786004, Assam, India*

<sup>c</sup>*Assistant Professor, Academy of Scientific and Innovative Research, CSIR-NEIST Campus Jorhat-785006, Assam, India*

*E-mail: ppahari@gmail.com; pallab@neist.res.in*

#### **Table of Contents**

|                   |     |
|-------------------|-----|
| Experimental..... | S2  |
| Spectra.....      | S22 |

#### **Experimental**

## Materials and apparatus

All the chemicals were purchased from Sigma Aldrich, Merck, SRL, and Spectrochem and used without further purification. The powder XRD measurements were carried out by using a 2-80° 2 $\theta$  on a Rigaku Ultima IV X-ray diffractometer with CuK $\alpha$  source ( $\lambda = 1.54056$  Å). In built program 'XG operation RINT 2200' associated with the XRD was used to process the data and 'Rigaku PDXL 1.2.0.1' library database was used for identification of the peaks. IR spectra (4000-400 cm<sup>-1</sup>) were recorded in a Perkin Elmer Spectrum 100 machine using KBr pellet. Transmission electron microscopy (TEM) and high-resolution transmission electron microscopy (HR-TEM) images were recorded on a JEOL JEM-2011 electron microscope functioned at an accelerating voltage of 200 kV. All NMR spectra of the products were recorded by using Bruker AV500 Avance-III 500 MHz FTNMR spectrometer. Thermogravimetric analysis (TGA) was carried out on a SDT Q600 V20.9 Build 20 instrument at a heating rate of 10 °C/min under N<sub>2</sub> atmosphere. HRMS data were recorded in a Waters XEVO G2-Xs QToF apparatus.

### General procedure for the synthesis of silica-supported iron oxide catalyst

Iron (III) chloride hexahydrate {FeCl<sub>3</sub>.6H<sub>2</sub>O} (1.2 g) and iron (II) chloride tetrahydrate {FeCl<sub>2</sub>.4H<sub>2</sub>O} (0.47 g) was dissolved in 100 mL of Milli-Q water under N<sub>2</sub> atmosphere to form a homogeneous solution. This was followed by the dropwise addition of 10 mL of 10 N NaOH solutions into the mixture under vigorous stirring and the resulting solution was heated at 80 °C for 1 h when a black precipitate of Fe<sub>3</sub>O<sub>4</sub> appeared. Silicic acid (2 g) was also homogeneously dispersed separately in 40 mL of Milli-Q water under N<sub>2</sub> atmosphere in another flask. The silicic acid solution was then added dropwise into the iron oxide solution with stirring. The mixture was further allowed to stir at room temperature under N<sub>2</sub> atmosphere for 16 h. The precipitate obtained was separated by magnetic decantation and washed with Milli-Q water and ethanol until neutral and then dehydrated at 200 °C for 4 h in a vacuum oven. A brownish-black powder of Fe<sub>3</sub>O<sub>4</sub>@SiO<sub>2</sub> was obtained.

### General procedure for the synthesis of chromenone / spirochromenone

To a mixture of 1,3-cyclohexanedione (0.9 mmol), benzaldehyde (0.9 mmol) and phenylacetylene (0.9 mmol), Fe<sub>3</sub>O<sub>4</sub>@SiO<sub>2</sub> (10 wt%) was added and the mixture was heated at 100 °C for 2 h under solvent-free condition. The progress of the reaction was followed using thin layer chromatography (TLC). After the completion of the reaction, 5 mL ethyl acetate

was added to the reaction mixture and the catalyst was removed by magnetic filtration. Organics were extracted with ethyl acetate (2 x 20 mL) and the combined organic fraction was washed with water (2 x 10 mL) and brine (10 mL). Drying over Na<sub>2</sub>SO<sub>4</sub> and removal of the solvent under reduced pressure, produced the crude mixture which was purified by column chromatography using ethyl acetate /hexane as eluent. For further recyclability experiments, the recovered catalyst was oven-dried (at 100 °C for 2 h) under vacuum before the next run.

### Characterization of Fe<sub>3</sub>O<sub>4</sub>@SiO<sub>2</sub> nanoparticle

Initially, the crystalline structure of the synthesized material was monitored by powder XRD analysis (Figure S1). The diffraction peaks at  $2\theta = 35.7^\circ$ ,  $53.2^\circ$  and  $65.8^\circ$  could be ascribed to the (311), (422) and (440) planes of cubic spinel phase of Fe<sub>3</sub>O<sub>4</sub> crystal. These values are in good agreement with the JCPDS card no. 19-629 for magnetite, respectively. The broad, low intensity diffraction peaks observed at  $2\theta$  from  $20^\circ$  to  $27^\circ$  can be ascribed to the silica surrounding the Fe<sub>3</sub>O<sub>4</sub> core.<sup>1,2</sup> The crystallite size of the prepared material was calculated from XRD pattern at  $2\theta$  value of  $35.7^\circ$  by means of Scherer equation and found to be in the range of 3.5 nm.

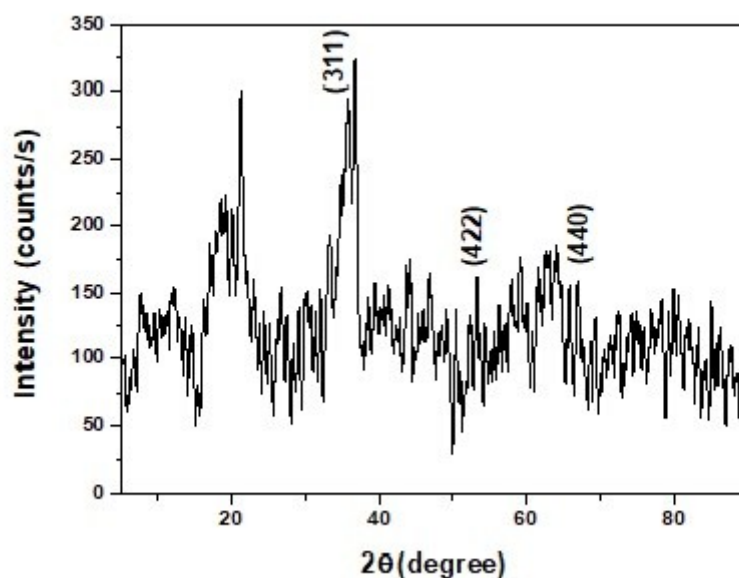

**Figure S1.** Powder XRD pattern of Fe<sub>3</sub>O<sub>4</sub>@SiO<sub>2</sub> nanoparticle

The functional groups present and the mode of bonding in the Fe<sub>3</sub>O<sub>4</sub>@SiO<sub>2</sub> nanoparticles were examined through FTIR spectroscopy recorded in the 4000-400 cm<sup>-1</sup> range (Figure S2).

The bands observed in the regions of 3391 and 1631  $\text{cm}^{-1}$  could be assigned to the  $-\text{OH}$  stretching and H-O-H bond vibrations of the surface adsorbed water molecules, respectively. The absorption peaks at 583 and 619  $\text{cm}^{-1}$  is due to Fe-O stretching vibration. The absorption peaks at 795 and 1054  $\text{cm}^{-1}$  may be attributed to stretching vibration of Si-O-Si (symmetrical), and Si-O-Si (asymmetrical), respectively.<sup>3</sup> These peaks confirm the coating of silica over  $\text{Fe}_3\text{O}_4$ .

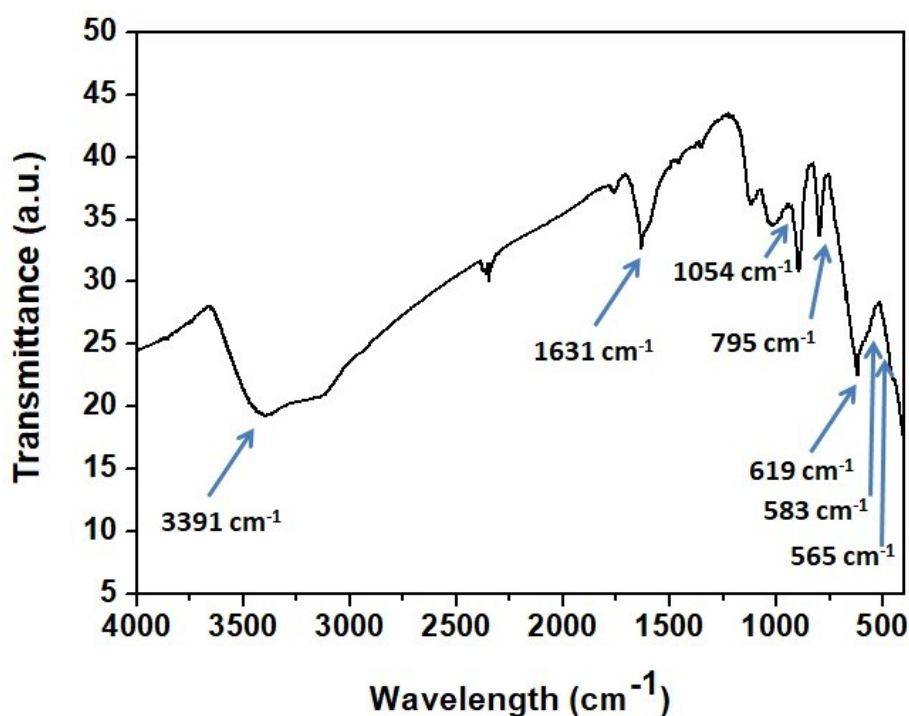

**Figure S2.** IR spectrum of  $\text{Fe}_3\text{O}_4@/\text{SiO}_2$  nanoparticle

The particle size and microstructure of the prepared  $\text{Fe}_3\text{O}_4@/\text{SiO}_2$  catalyst was characterized by TEM and HRTEM analysis (Figure S3). The low resolution TEM image revealed homogeneous distribution of the particles with nearly spherical shape. The particle size distribution was found to be in the range 2-3 nm with number-average diameter of 2.5 nm (standard deviation (SD) = 0.22). The close relation between surface-weighted diameter ( $D_s = 2.58$  nm) and volume-weighted diameter ( $D_v = 2.59$  nm) revealed narrow-size distribution of the prepared nanoparticle. The HRTEM image indicated that silica shell was successfully coated on the surface of  $\text{Fe}_3\text{O}_4$  nanoparticle and the inter-planar lattice-fringe spacing of the  $\text{Fe}_3\text{O}_4$  core was found to be 0.25 nm, corresponding to the (311) spinel phase

of  $\text{Fe}_3\text{O}_4$  crystal (Figure S3b). The selected area electron diffraction (SAED) pattern further confirmed the crystalline nature of the sample as indicated by the (311) and (422) crystalline planes (Figure S3c). Energy Dispersive X-ray (EDX) analysis of the prepared nanoparticle indicates the presence of Fe, Si and O signals, devoid of the presence of any other metal or impurity (Figure S3d).

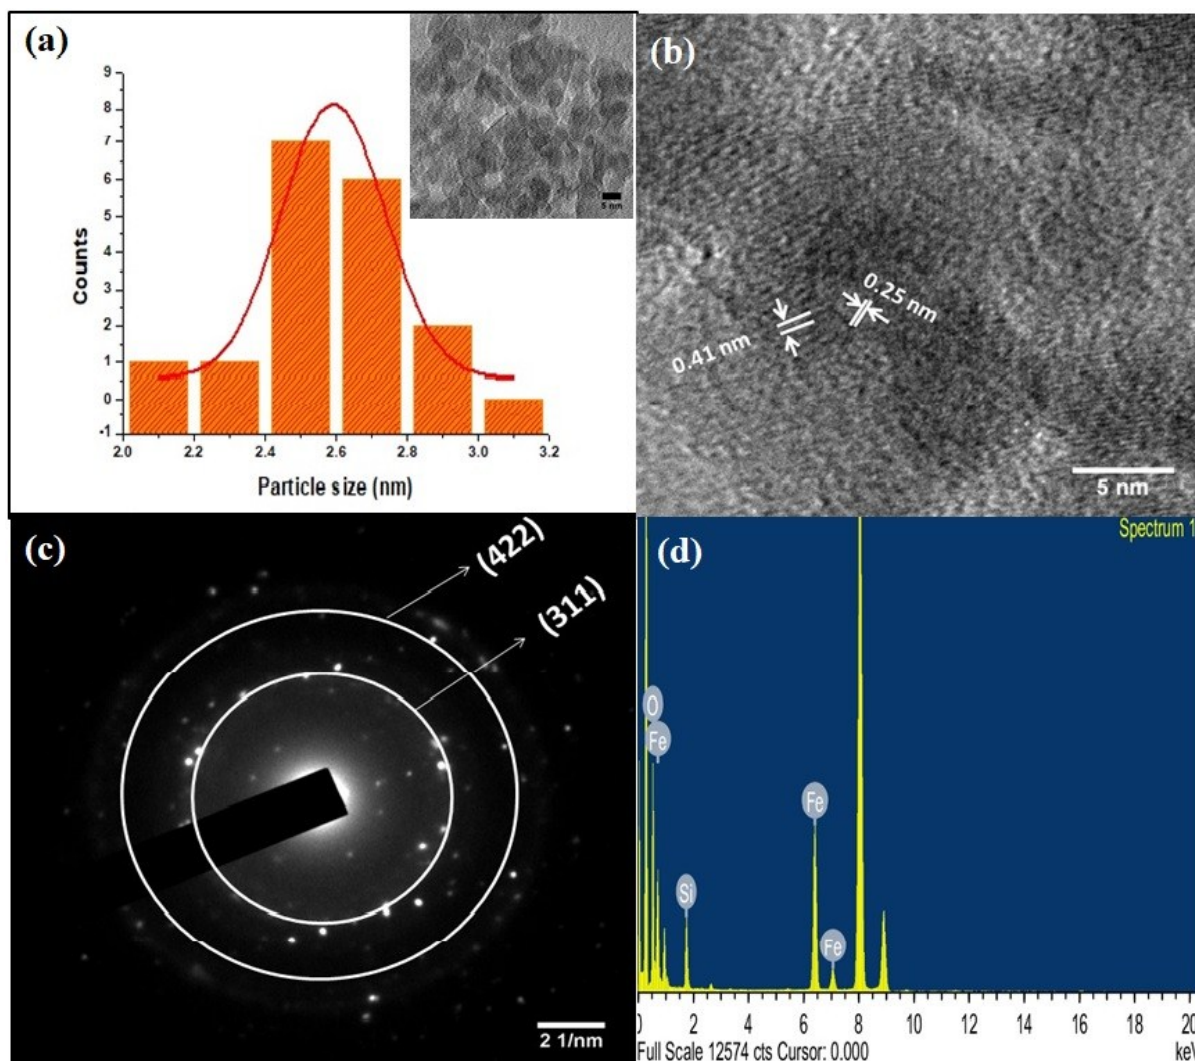

**Figure S3.** (a) Particle size distribution histogram, TEM image of  $\text{Fe}_3\text{O}_4@SiO_2$  (inset a), (b) HRTEM image with fringe spacing (c) SAED pattern of  $\text{Fe}_3\text{O}_4@SiO_2$  nanoparticles (d) and EDX spectra of  $\text{Fe}_3\text{O}_4@SiO_2$  nanoparticles showing the presence of Fe, O and Si.

The magnetic properties of the synthesized  $\text{Fe}_3\text{O}_4@SiO_2$  nanoparticles were studied by Vibrating Sample Magnetometer at room temperature (Figure S4). Saturation magnetization value of 13.24 emu/g was obtained for the synthesized nanoparticle, which was quite lower than that reported for bare  $\text{Fe}_3\text{O}_4$  nanoparticle.<sup>2</sup> This reduction in saturation magnetization value can be attributed to the coating of  $\text{Fe}_3\text{O}_4$  nanoparticles by an amorphous silica shell.<sup>2</sup>

However, the decrease in saturation magnetization value did not affect the magnetic properties of the nanoparticles and they could be magnetically separated by the application of an external magnetic field.

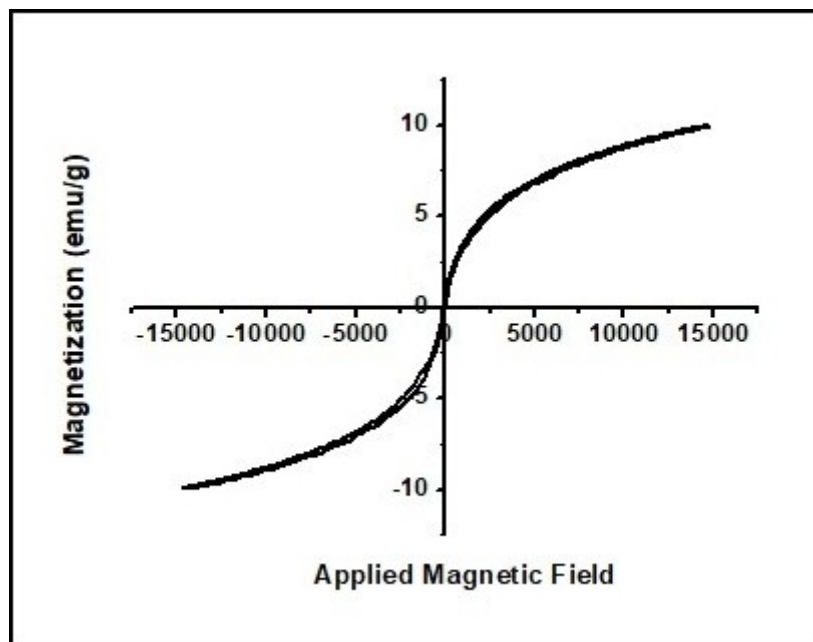

**Figure S4.** Magnetisation curve of  $\text{Fe}_3\text{O}_4@\text{SiO}_2$  nanoparticles

The thermal stability of the magnetic  $\text{Fe}_3\text{O}_4@\text{SiO}_2$  nanoparticles was analysed by thermogravimetric analysis (TGA) as shown in Figure S5. The TGA curve of  $\text{Fe}_3\text{O}_4@\text{SiO}_2$  nanoparticles showed a weight loss of 12.49% at 800 °C. The initial weight loss of 9.73% below 200 °C can be attributed to the release of adsorbed water molecules from the catalyst surface. This confirms high thermal stability of the prepared  $\text{Fe}_3\text{O}_4@\text{SiO}_2$  nanoparticle.

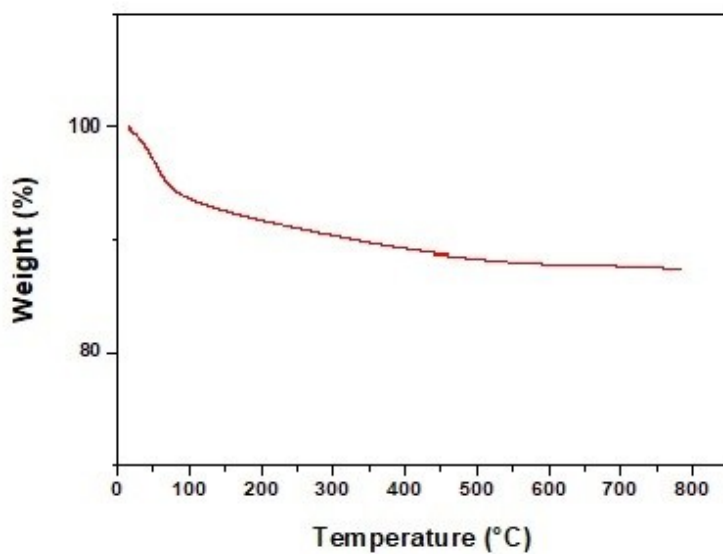

**Figure S5.** TGA curve of Fe<sub>3</sub>O<sub>4</sub>@SiO<sub>2</sub> nanoparticles

To study the recyclability of the catalyst, after the completion of the reaction, the solid catalyst was recovered by using an external magnet followed by washing with Milli-Q water and drying at 100 °C. It was observed that the catalyst could be reused up to five consecutive catalytic cycles without any significant loss in the activity (Figure S6). However, after the 5<sup>th</sup> run, the catalytic activity of the recovered catalyst decreased gradually.

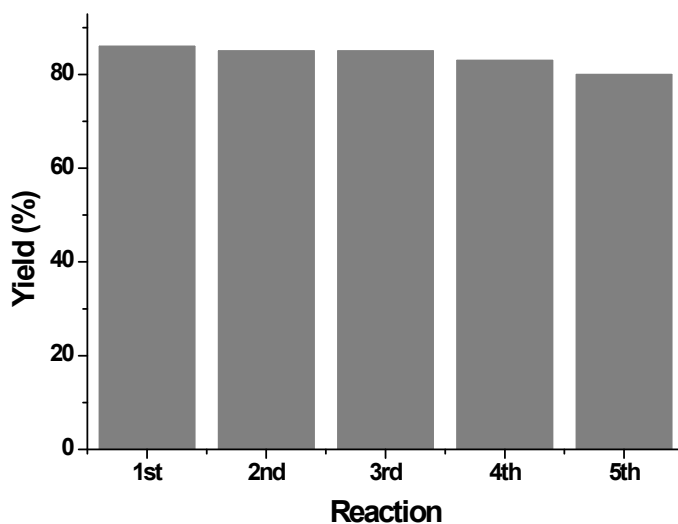

**Figure S6.** Study of recyclability of the catalyst

## Characterization data of the product

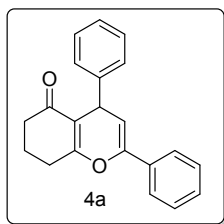

### 2,4-diphenyl-4,6,7,8-tetrahydro-5H-chromen-5-one (4a)

Orange solid compound. Mp: 169-171 °C (Lit.<sup>4</sup> 171-173 °C); Yield: 86%. <sup>1</sup>H NMR (500 MHz, CDCl<sub>3</sub>): δ 7.60-7.58 (m, 2H), 7.38 – 7.31 (m, 5H), 7.30 -7.25 (m, 2H), 7.20 -7.15 (m, 1H), 5.71 (d, 1H, *J* = 5.0 Hz), 4.52 (d, 1H, *J* = 5.0 Hz), 2.75 – 2.64 (m, 2H), 2.40 – 2.35 (m, 2H), 2.08 – 2.02 (m, 2H); <sup>13</sup>C NMR (125 MHz, CDCl<sub>3</sub>): δ 197.7 (C), 166.6 (C), 147.0 (C), 145.4 (C), 133.1 (C), 128.9 (CH), 128.6 (CH), 128.6 (CH), 128.4 (CH), 126.8 (CH), 124.7 (CH), 114.0 (C), 104.7 (CH), 37.3 (CH<sub>2</sub>), 35.5 (CH), 27.9 (CH<sub>2</sub>), 20.6 (CH<sub>2</sub>); HRMS (ESI) *m/z* 303.1394 ([M+H]<sup>+</sup> C<sub>21</sub>H<sub>19</sub>O<sub>2</sub> requires 303.1385).

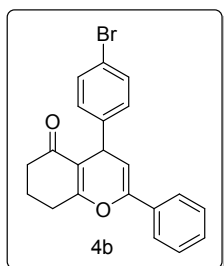

### 4-(4-bromophenyl)-2-phenyl-4,6,7,8-tetrahydro-5H-chromen-5-one (4b)<sup>5</sup>

White solid compound. Mp: 110-112 °C. Yield: 79%. <sup>1</sup>H NMR (500 MHz, CDCl<sub>3</sub>): δ 7.60 - 7.56 (m, 2H), 7.41 – 7.35 (m, 5H), 7.21 (d, 2H, *J* = 8.5 Hz), 5.66 (d, 1H, *J* = 5.0 Hz), 4.49 (d, 1H, *J* = 5.0 Hz), 2.71 – 2.64 (m, 2H), 2.41 – 2.35 (m, 2H), 2.09 – 2.01 (m, 2H).; <sup>13</sup>C NMR (125 MHz, CDCl<sub>3</sub>): δ 197.3 (C), 166.4 (C), 147.0 (C), 144.1 (C), 132.6 (C), 131.3 (CH), 129.9 (CH), 128.8 (CH), 128.4 (CH), 124.4 (CH), 120.3 (C), 113.3 (C), 103.7 (CH), 36.9



(CH<sub>2</sub>), 34.7 (CH), 27.6 (CH<sub>2</sub>), 20.3 (CH<sub>2</sub>); HRMS (ESI)  $m/z$  381.0497 ([M+H]<sup>+</sup> C<sub>21</sub>H<sub>18</sub>O<sub>2</sub>Br requires 381.0490).

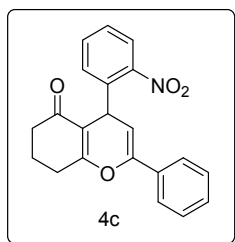

#### 4-(2-nitrophenyl)-2-phenyl-4,6,7,8-tetrahydro-5H-chromen-5-one (4c)

Yellow solid compound. Mp: 160-162 °C. Yield: 77%. <sup>1</sup>H NMR (500 MHz, CDCl<sub>3</sub>):  $\delta$  7.82 (d, 1H,  $J$  = 8.0 Hz), 7.62 – 7.58 (dd, 2H,  $J$  = 8.0 Hz, 1.5 Hz), 7.49 (t, 1H,  $J$  = 7.5 Hz), 7.40 – 7.33 (m, 4H), 7.29 (t, 1H,  $J$  = 7.5 Hz), 5.88 (d, 1H,  $J$  = 4.5 Hz), 5.09 (d, 1H,  $J$  = 4.5 Hz), 2.76 – 2.68 (m, 2H), 2.38 – 2.34 (m, 2H), 2.11 – 2.04 (m, 2H); <sup>13</sup>C NMR (125 MHz, CDCl<sub>3</sub>):  $\delta$  197.1 (C), 167.5 (C), 149.4 (C), 147.7 (C), 139.9 (C), 133.1 (CH), 132.8 (C), 130.7 (CH), 129.2 (CH), 128.7 (CH), 127.4 (CH), 124.7 (CH), 124.3 (CH), 112.9 (C), 102.9 (CH), 36.9 (CH<sub>2</sub>), 31.1 (CH), 27.8 (CH<sub>2</sub>), 20.7 (CH<sub>2</sub>); HRMS (ESI)  $m/z$  348.1238 ([M+H]<sup>+</sup> C<sub>21</sub>H<sub>18</sub>NO<sub>4</sub> requires 348.1236).

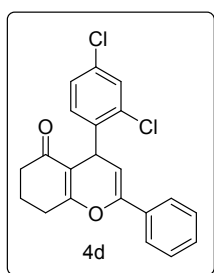

#### 4-(2,4-dichlorophenyl)-2-phenyl-4,6,7,8-tetrahydro-5H-chromen-5-one (4d)

Pale yellow solid compound. Mp: 85-87 °C. Yield: 80 %. <sup>1</sup>H NMR (500 MHz, CDCl<sub>3</sub>):  $\delta$  7.57 – 7.54 (m, 2H), 7.38 – 7.33 (m, 4H), 7.15 (dd, 1H,  $J$  = 8.5 Hz, 2.5 Hz), 7.09 (d, 1H,  $J$  = 8.5 Hz), 5.68 (d, 1H,  $J$  = 4.5 Hz), 4.93 (d, 1H,  $J$  = 4.5 Hz), 2.80 – 2.69 (m, 2H), 2.46 – 2.40

(m, 2H), 2.18 – 2.07 (m, 2H);  $^{13}\text{C}$  NMR (125 MHz,  $\text{CDCl}_3$ ):  $\delta$  197.2 (C), 168.1 (C), 147.3 (C), 140.9 (C), 133.7 (C), 132.8 (CH), 130.4 (C), 129.6 (CH), 129.2 (CH), 128.8 (C), 128.6 (CH), 127.7 (CH), 124.7 (CH), 112.1 (C), 102.4 (CH), 37.2 ( $\text{CH}_2$ ), 32.5 (CH), 28.0 ( $\text{CH}_2$ ), 20.7 ( $\text{CH}_2$ ); HRMS (ESI)  $m/z$  371.0591 ( $[\text{M}+\text{H}]^+$   $\text{C}_{21}\text{H}_{17}\text{O}_2\text{Cl}_2$  requires 371.0606).

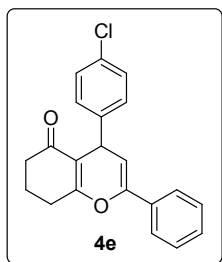

#### 4-(4-chlorophenyl)-2-phenyl-4,6,7,8-tetrahydro-5H-chromen-5-one (4e)

White solid compound. Mp: 117-119 °C (Lit.<sup>4</sup> 117-118 °C). Yield: 79%.  $^1\text{H}$  NMR (500 MHz,  $\text{CDCl}_3$ ):  $\delta$  7.61 – 7.57 (m, 2H), 7.40 – 7.34 (m, 3H), 7.29 – 7.22 (m, 4H), 5.66 (d, 1H,  $J = 5.0$  Hz), 4.50 (d, 1H,  $J = 5.0$  Hz), 2.74 – 2.64 (m, 2H), 2.42 – 2.36 (m, 2H), 2.09 – 2.00 (m, 2H);  $^{13}\text{C}$  NMR (125 MHz,  $\text{CDCl}_3$ ):  $\delta$  197.6 (C), 166.7 (C), 147.3 (C), 143.9 (C), 132.9 (C), 132.5 (C), 129.8 (CH), 129.1 (CH), 128.7 (CH), 128.7 (CH), 124.7 (CH), 113.7 (C), 104.1 (CH), 37.2 ( $\text{CH}_2$ ), 34.9 (CH), 27.9 ( $\text{CH}_2$ ), 20.6 ( $\text{CH}_2$ ); HRMS (ESI)  $m/z$  337.0996 ( $[\text{M}+\text{H}]^+$   $\text{C}_{21}\text{H}_{18}\text{O}_2\text{Cl}$  requires 337.0995).

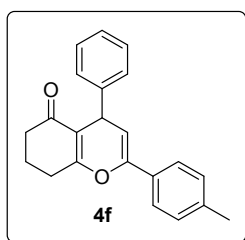

#### 4-phenyl-2-(p-tolyl)-4,6,7,8-tetrahydro-5H-chromen-5-one (4f)

White solid compound. Mp: 130-132 °C (lit.<sup>6</sup> 130-131 °C). Yield: 83%.  $^1\text{H}$  NMR (500 MHz,  $\text{CDCl}_3$ ):  $\delta$  7.46 (d, 2H,  $J = 8.0$  Hz), 7.33 – 7.29 (m, 2H), 7.26 (d, 2H,  $J = 8.0$  Hz), 7.17 – 7.13 (m, 3H), 5.64 (d, 1H,  $J = 5.0$  Hz), 4.49 (d, 1H,  $J = 5.0$  Hz), 2.72 – 2.61 (m, 2H), 2.39 - 2.35

(m, 2H), 2.34 (s, 2H), 2.07 – 1.97 (m, 2H);  $^{13}\text{C}$  NMR (125 MHz,  $\text{CDCl}_3$ ):  $\delta$  197.7 (C), 166.6 (C), 147.1 (C), 145.6 (C), 138.9 (C), 130.2 (C), 129.3 (CH), 128.6 (CH), 128.4 (CH), 126.7 (CH), 124.6 (CH), 114.1 (C), 103.8 (CH), 37.3 ( $\text{CH}_2$ ), 35.4 (CH), 28.0 ( $\text{CH}_2$ ), 21.4 ( $\text{CH}_2$ ), 20.6 ( $\text{CH}_3$ ); HRMS (ESI)  $m/z$  317.1554 ( $[\text{M}+\text{H}]^+$   $\text{C}_{22}\text{H}_{21}\text{O}_2$  requires 317.1542).

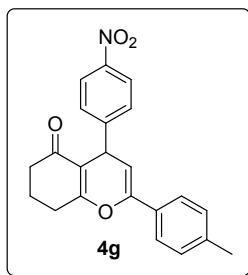

#### 4-(4-nitrophenyl)-2-(p-tolyl)-4,6,7,8-tetrahydro-5H-chromen-5-one (4g)

Pale yellow solid compound. Mp: 144-145 °C. Yield: 80%.  $^1\text{H}$  NMR (500 MHz,  $\text{CDCl}_3$ ):  $\delta$  8.11 (d, 2H,  $J = 8.5$  Hz), 7.49 - 7.43 (m, 4H), 7.17 (d, 2H,  $J = 8.5$  Hz), 5.57 (d, 1H,  $J = 4.5$  Hz), 4.60 (d, 1H,  $J = 4.5$  Hz), 2.74 – 2.65 (m, 2H), 2.39 – 2.35 (m, 2H), 2.35 (s, 3H), 2.11 – 2.00 (m, 2H);  $^{13}\text{C}$  NMR (125 MHz,  $\text{CDCl}_3$ ):  $\delta$  196.9 (C), 167.3 (C), 152.8 (C), 148.0 (C), 146.8 (C), 139.5 (C), 129.8 (C), 129.4 (CH), 129.3 (CH), 124.7 (CH), 123.9 (CH), 113.0 (C), 102.1 (CH), 37.1 ( $\text{CH}_2$ ), 35.7 (CH), 28.0 ( $\text{CH}_2$ ), 21.5 ( $\text{CH}_2$ ), 20.6 ( $\text{CH}_3$ ); HRMS (ESI)  $m/z$  362.1390 ( $[\text{M}+\text{H}]^+$   $\text{C}_{22}\text{H}_{20}\text{NO}_4$  requires 362.1392).

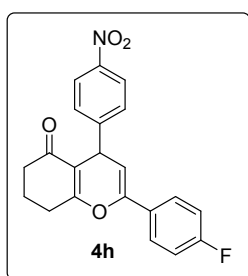

#### 2-(4-fluorophenyl)-4-(4-nitrophenyl)-4,6,7,8-tetrahydro-5H-chromen-5-one (4h)

Yellow solid compound. Mp: 55-57 °C. Yield: 74%.  $^1\text{H}$  NMR (500 MHz,  $\text{CDCl}_3$ ):  $\delta$  8.12 (d, 2H,  $J = 8.5$  Hz), 7.57 - 7.52 (m, 2H), 7.47 (d, 2H,  $J = 8.5$  Hz), 7.08 - 7.02 (m, 2H), 5.56 (d,

1H,  $J = 4.5$  Hz), 4.61 (d, 1H,  $J = 4.5$  Hz), 2.72 - 2.64 (m, 2H), 2.40 - 2.36 (m, 2H), 2.12-1.90 (m, 2H);  $^{13}\text{C}$  NMR (125 MHz,  $\text{CDCl}_3$ ):  $\delta$  197.4 (C), 167.1 (C), 163.4 (C, d,  $J = 247.5$  Hz), 152.5 (C), 147.1 (C), 146.9 (C), 129.3 (CH), 128.8 (C), 126.7 (CH, d,  $J = 8.7$  Hz), 124.0 (CH), 115.8 (CH, d,  $J = 21.2$  Hz), 113.0 (C), 102.7 (CH), 37.1 ( $\text{CH}_2$ ), 35.7 (CH), 27.9 ( $\text{CH}_2$ ), 20.5 ( $\text{CH}_2$ ); HRMS (ESI)  $m/z$  366.1136 ( $[\text{M}+\text{H}]^+$   $\text{C}_{21}\text{H}_{17}\text{NO}_4\text{F}$  requires 366.1142).

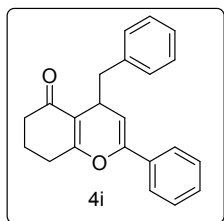

#### 4-benzyl-2-phenyl-4,6,7,8-tetrahydro-5H-chromen-5-one (4i)

Yellow solid compound. Mp: 55-57 °C. Yield: 84%.  $^1\text{H}$  NMR (500 MHz,  $\text{CDCl}_3$ ):  $\delta$  7.49 - 7.45 (m, 2H), 7.35 - 7.30 (m, 4H), 7.28 - 7.23 (m, 4H), 5.47 (d, 1H,  $J = 5.0$  Hz), 3.71 - 3.63 (m, 1H), 3.06 - 3.01 (m, 1H), 2.69 - 2.63 (m, 1H), 2.51 - 2.40 (m, 4H), 2.06 - 2.01 (m, 2H);  $^{13}\text{C}$  NMR (125 MHz,  $\text{CDCl}_3$ ):  $\delta$  198.4 (C), 167.9 (C), 147.9 (C), 139.1 (C), 133.4 (C), 129.9 (CH), 128.8 (CH), 128.6 (CH), 128.1 (CH), 126.3 (CH), 124.6 (CH), 113.4 (C), 103.9 (CH), 42.9 ( $\text{CH}_2$ ), 37.4 ( $\text{CH}_2$ ), 31.2 (CH), 27.8 ( $\text{CH}_2$ ), 20.7 ( $\text{CH}_2$ ); HRMS (ESI)  $m/z$  317.1554 ( $[\text{M}+\text{H}]^+$   $\text{C}_{22}\text{H}_{21}\text{O}_2$  requires 317.1542).

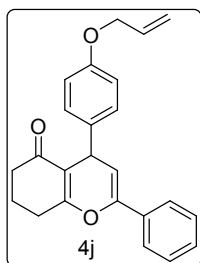

#### 4-(4-(allyloxy)phenyl)-2-phenyl-4,6,7,8-tetrahydro-5H-chromen-5-one (4j)

Yellow solid compound. Mp: 92-94 °C. Yield: 85%. <sup>1</sup>H NMR (500 MHz, CDCl<sub>3</sub>): δ 7.63 – 7.59 (m, 2H), 7.41 – 7.32 (m, 3H), 7.26 (d, 2H, *J* = 9.0 Hz), 6.85 (d, 2H, *J* = 9.0 Hz), 6.10 – 6.0 (m, 1H), 5.72 (d, 1H, *J* = 5.0 Hz), 5.42 (dd, 1H, *J* = 17.0, 1.5 Hz), 5.39 (dd, 1H, *J* = 11.0, 1.5 Hz), 4.52 – 4.48 (m, 3H), 2.75 – 2.65 (m, 2H), 2.43 – 2.37 (m, 2H), 2.09 – 2.02 (m, 2H); <sup>13</sup>C NMR (125 MHz, CDCl<sub>3</sub>): δ 197.8 (C), 166.3 (C), 157.5 (C), 146.9 (C), 137.9 (C), 133.6 (CH), 133.2 (C), 129.4 (CH), 128.9 (CH), 128.6 (CH), 124.6 (CH), 117.8 (CH<sub>2</sub>), 114.8 (CH), 114.3 (C), 104.8 (CH), 69.0 (CH<sub>2</sub>), 37.3 (CH<sub>2</sub>), 34.5 (CH), 27.9 (CH<sub>2</sub>), 20.6 (CH<sub>2</sub>); HRMS (ESI) *m/z* 359.1665 ([M+H]<sup>+</sup> C<sub>24</sub>H<sub>23</sub>O<sub>3</sub> requires 359.1647).

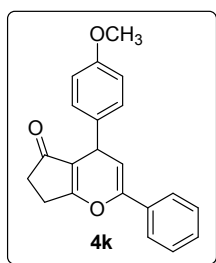

#### 4-(4-methoxyphenyl)-2-phenyl-6,7-dihydrocyclopenta[b]pyran-5(4H)-one (4k)

Brown solid compound. Mp: 60-62 °C. Yield: 84%. <sup>1</sup>H NMR (500 MHz, CDCl<sub>3</sub>): δ 7.66 (d, 2H, *J* = 7.0 Hz), 7.44 – 7.38 (m, 3H), 7.29 – 7.27 (m, 2H), 6.87 (d, 2H, *J* = 8.5 Hz), 5.68 (d, 1H, *J* = 4.5 Hz), 4.44 (d, 1H, *J* = 3.5 Hz), 3.80 (s, 3H), 2.83 -2.78 (m, 2H), 2.52 – 2.48 (m, 2H); <sup>13</sup>C NMR (125 MHz, CDCl<sub>3</sub>): δ 203.4 (C), 178.7 (C), 158.7 (C), 148.5 (C), 135.6 (C), 133.0 (C), 129.4 (CH), 129.2 (CH), 128.7 (CH), 124.9 (CH), 117.5 (C), 114.1 (CH), 104.3 (CH), 55.5 (CH<sub>3</sub>), 35.0 (CH), 33.6 (CH<sub>2</sub>), 25.8 (CH<sub>2</sub>); HRMS (ESI) *m/z* 319.1346 ([M+H]<sup>+</sup> C<sub>21</sub>H<sub>19</sub>O<sub>3</sub> requires 319.1334).

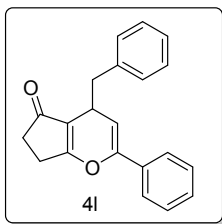

#### 4-benzyl-2-phenyl-6,7-dihydrocyclopenta[b]pyran-5(4H)-one (4I)

Orange solid compound. Mp: 88-90 °C. Yield: 83%. <sup>1</sup>H NMR (500 MHz, CDCl<sub>3</sub>): δ 7.52 – 7.48 (m, 2H), 7.41 – 7.33 (m, 3H), 7.30 – 7.16 (m, 5H), 5.42 (d, 1H, *J* = 4.0 Hz), 3.62 – 3.58 (m, 1H), 3.33 – 3.28 (m, 1H), 2.75 – 2.63 (m, 3H), 2.54 – 2.50 (m, 2H); <sup>13</sup>C NMR (125 MHz, CDCl<sub>3</sub>): δ 204.3 (C), 180.2 (C), 149.0 (C), 138.6 (C), 133.2 (C), 129.8 (CH), 129.1 (CH), 128.7 (CH), 128.4 (CH), 126.4 (CH), 124.9 (CH), 117.0 (C), 103.6 (CH), 41.2 (CH<sub>2</sub>), 33.6 (CH), 31.8 (CH<sub>2</sub>), 25.7 (CH<sub>2</sub>); HRMS (ESI) *m/z* 303.1394 ([M+H]<sup>+</sup> C<sub>21</sub>H<sub>19</sub>O<sub>2</sub> requires 303.1385).

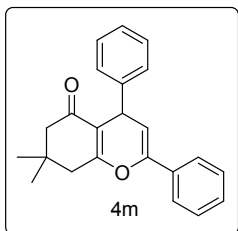

#### 7,7-dimethyl-2,4-diphenyl-4,6,7,8-tetrahydro-5H-chromen-5-one (4m)

Yellow solid compound. Mp: 141-143 °C (lit.<sup>6</sup> 142-143 °C). Yield: 81%. <sup>1</sup>H NMR (500 MHz, CDCl<sub>3</sub>): δ 7.63 – 7.59 (m, 2H), 7.40 – 7.27 (m, 7H), 7.19 (t, 1H, *J* = 7 Hz), 5.74 (d, 1H, *J* = 5.0 Hz), 4.52 (d, 1H, *J* = 5.0 Hz), 2.58 (s, 2H), 2.27 (ABq, 2H, *J* = 16.5 Hz), 1.16 (s, 3H), 1.09 (s, 3H); <sup>13</sup>C NMR (125 MHz, CDCl<sub>3</sub>): δ 197.5 (C), 164.8 (C), 146.9 (C), 145.4 (C), 133.2 (C), 128.9 (CH), 128.6 (CH), 128.6 (CH), 128.4 (CH), 126.8 (CH), 124.7 (CH), 112.7 (C), 104.7 (CH), 51.1 (CH<sub>2</sub>), 41.7 (CH), 35.6 (CH<sub>2</sub>), 32.3 (C), 29.4 (CH<sub>3</sub>), 27.9 (CH<sub>3</sub>); HRMS (ESI) *m/z* 331.1716 ([M+H]<sup>+</sup> C<sub>23</sub>H<sub>23</sub>O<sub>2</sub> requires 331.1698).

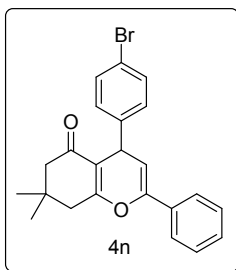

**4-(4-bromophenyl)-7,7-dimethyl-2-phenyl-4,6,7,8-tetrahydro-5H-chromen-5-one (4n)<sup>3</sup>**

Pale yellow solid compound. Mp: 93-94 °C. Yield: 72%. <sup>1</sup>H NMR (500 MHz, CDCl<sub>3</sub>): δ 7.62 – 7.58 (m, 2H), 7.43 – 7.35 (m, 5H), 7.23 (d, 2H, *J* = 8.5 Hz), 5.68 (d, 1H, *J* = 5.0 Hz), 4.49 (d, 1H, *J* = 5.0 Hz), 2.57 (s, 2H), 2.26 (ABq, 2H, *J* = 16.0 Hz), 1.15 (s, 3H), 1.07 (s, 3H); <sup>13</sup>C NMR (125 MHz, CDCl<sub>3</sub>): δ 197.4 (C), 164.9 (C), 147.3 (C), 144.5 (C), 132.9 (C), 131.7 (CH), 130.2 (CH), 129.1 (CH), 128.7 (CH), 124.7 (CH), 120.6 (C), 112.4 (C), 103.9 (CH), 51.1 (CH<sub>2</sub>), 41.6 (CH<sub>2</sub>), 35.2 (CH), 32.4 (C), 29.4 (CH<sub>3</sub>), 27.8 (CH<sub>3</sub>); HRMS (ESI) *m/z* 425.0768 ([M+H]<sup>+</sup> C<sub>23</sub>H<sub>22</sub>O<sub>3</sub>Br requires 425.0752)

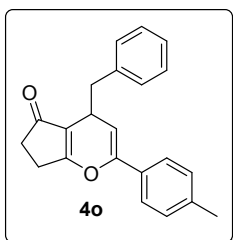

**4-benzyl-2-(p-tolyl)-6,7-dihydrocyclopenta[b]pyran-5(4H)-one (4o)**

Yellow solid compound. Mp: 125-126 °C. Yield: 80%. <sup>1</sup>H NMR (500 MHz, CDCl<sub>3</sub>): δ 7.39 (d, 2H, *J* = 8.5 Hz), 7.30 – 7.25 (m, 2H), 7.23 – 7.20 (m, 1H), 7.20 – 7.15 (m, 4H), 5.37 (d, 1H, *J* = 4.0 Hz), 3.62 – 3.55 (m, 1H), 3.30 (dd, 1H, *J* = 13.0, 3.5 Hz), 2.71 (dd, 1H, *J* = 13.0, 9.0 Hz), 2.67 - 2.63 (m, 2H), 2.54 – 2.50 (m, 2H), 2.36 (s, 3H); <sup>13</sup>C NMR (125 MHz, CDCl<sub>3</sub>): δ 204.3 (C), 180.2 (C), 149.0 (C), 139.1 (C), 138.6 (C), 130.3 (C), 129.8 (CH), 129.3 (CH), 128.3 (CH), 126.4 (CH), 124.8 (CH), 117.0 (C), 102.7 (CH), 41.2 (CH<sub>2</sub>), 33.6 (CH), 31.8

(CH<sub>2</sub>), 25.7 (CH<sub>2</sub>), 21.4 (CH<sub>3</sub>); HRMS (ESI)  $m/z$  317.1554 ([M+H]<sup>+</sup> C<sub>22</sub>H<sub>21</sub>O<sub>2</sub> requires 317.1542)

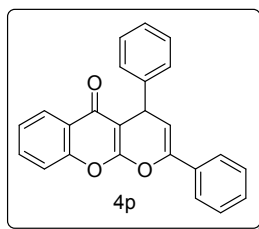

### 2,4-diphenyl-4*H*,5*H*-pyrano[2,3-*b*]chromen-5-one (4p)

Yellow solid compound. Mp: 158-159 °C. Yield: 84%. <sup>1</sup>H NMR (500 MHz, CDCl<sub>3</sub>): δ 8.07 – 8.03 (m, 1H), 7.79 – 7.74 (m, 2H), 7.62 – 7.57 (m, 1H), 7.50 – 7.41 (m, 5H), 7.40 -7.32 (m, 4H), 7.28 – 7.23 (m, 1H), 5.87 (d, 1H, *J* = 4.5 Hz), 4.74 (d, 1H, *J* = 4.5 Hz); <sup>13</sup>C NMR (125 MHz, CDCl<sub>3</sub>): δ 161.7 (C), 156.0 (C), 153.0 (C), 147.1 (C), 143.7 (C), 132.8 (C), 132.2 (CH), 129.5 (CH), 128.9 (CH), 128.8 (CH), 128.7 (CH), 127.4 (CH), 124.9 (CH), 124.0 (CH), 123.0 (CH), 117.1 (CH), 114.8 (C), 104.0 (CH), 103.9 (C), 36.8 (CH); HRMS (ESI)  $m/z$  353.1198 ([M+H]<sup>+</sup> C<sub>24</sub>H<sub>17</sub>O<sub>3</sub> requires 353.1178)

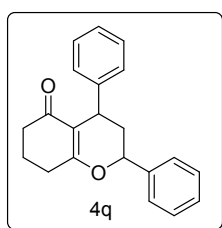

### 2,4-diphenyl-2,3,4,6,7,8-hexahydro-5*H*-chromen-5-one (4q)

White solid compound. Mp: 127-129 °C (lit.<sup>7</sup> 129-130 °C). Yield: 81%. <sup>1</sup>H NMR (500 MHz, CDCl<sub>3</sub>): δ 7.37-7.36 (m, 4H), 7.34-7.31 (m, 1H), 7.26-7.23 (m, 2H), 7.19-7.13 (m, 3H), 4.97 (dd, 1H, *J* = 11.5, 1.5 Hz), 3.97-3.93 (m, 1H), 2.64-2.24 (m, 5H), 2.05-1.96 (m, 3H); <sup>13</sup>C NMR (125 MHz, CDCl<sub>3</sub>): δ 196.8 (C), 173.1 (C), 145.0 (C), 139.3 (C), 128.6 (CH), 128.3 (CH), 128.3 (CH), 126.4 (CH), 126.0 (CH), 125.9 (CH), 115.6 (C), 79.0 (CH), 41.7 (CH<sub>2</sub>),



37.1 (CH<sub>2</sub>), 36.9 (CH), 29.2 (CH<sub>2</sub>), 20.2 (CH<sub>2</sub>); HRMS (ESI)  $m/z$  305.1555 ([M+H]<sup>+</sup> C<sub>21</sub>H<sub>21</sub>O<sub>2</sub> requires 305.1542)

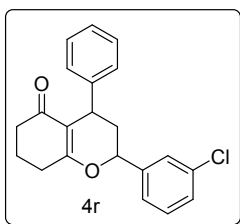

#### 2-(3-chlorophenyl)-4-phenyl-2,3,4,6,7,8-hexahydro-5H-chromen-5-one (4r)

White solid compound. Mp: 150-151 °C. Yield: 71%. <sup>1</sup>H NMR (500 MHz, CDCl<sub>3</sub>): δ 7.38 (s, 1H), 7.30-7.28 (m, 2H), 7.26-7.23 (m, 3H), 7.17-7.13 (m, 3H), 4.96 (dd, 1H,  $J = 11.5, 1.5$  Hz), 3.96-3.92 (m, 1H), 2.67-2.36 (m, 5H), 2.07-1.91 (m, 3H); <sup>13</sup>C NMR (125 MHz, CDCl<sub>3</sub>): δ 196.4 (C), 172.8 (C), 144.6 (C), 141.5 (C), 134.4 (C), 130.0 (CH), 128.5 (CH), 128.5 (CH), 126.3 (CH), 126.1 (CH), 126.0 (CH), 124.1 (CH), 115.6 (C), 78.1 (CH), 41.7 (CH<sub>2</sub>), 37.7 (CH<sub>2</sub>), 36.8 (CH), 29.0 (CH<sub>2</sub>), 20.1 (CH<sub>2</sub>); HRMS (ESI)  $m/z$  339.1162 ([M+H]<sup>+</sup> C<sub>21</sub>H<sub>20</sub>O<sub>2</sub>Cl requires 339.1152).

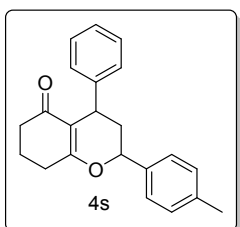

#### 4-phenyl-2-(p-tolyl)-2,3,4,6,7,8-hexahydro-5H-chromen-5-one (4s)

White solid compound. Mp: 121-123 °C. Yield: 75%. <sup>1</sup>H NMR (500 MHz, CDCl<sub>3</sub>): δ 7.28 – 7.23 (m, 5H), 7.21 – 7.14 (m, 4H), 4.94 (d, 1H,  $J = 10.5$  Hz), 3.96 – 3.91 (m, 1H), 2.64 – 2.39 (m, 3H), 2.35 (s, 3H), 2.36 – 2.17 (m, 2H), 2.05-1.97 (m, 3H); <sup>13</sup>C NMR (125 MHz, CDCl<sub>3</sub>): δ 196.7 (C), 173.2 (C), 145.0 (C), 138.2 (C), 136.3 (C), 129.2 (CH), 128.3 (CH), 126.3 (CH), 126.1 (CH), 125.8 (CH), 115.5 (C), 79.0 (CH), 41.6 (CH<sub>2</sub>), 38.0 (CH<sub>2</sub>), 36.9 (CH), 29.1

(CH<sub>2</sub>), 21.1 (CH<sub>2</sub>), 20.0 (CH<sub>3</sub>); HRMS (ESI) *m/z* 319.1708 ([M+H]<sup>+</sup> C<sub>22</sub>H<sub>23</sub>O<sub>2</sub> requires 319.1698)

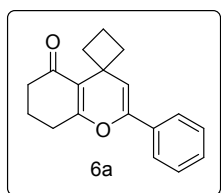

### 2-phenyl-7,8-dihydrospiro[chromene-4,1'-cyclobutan]-5(6*H*)-one (6a)

Yellow solid compound. Mp: 77-78 °C. Yield: 79%. <sup>1</sup>H NMR (500 MHz, CDCl<sub>3</sub>): δ 7.61 (d, 2H, *J* = 7.0 Hz), 7.40 (t, 1H, *J* = 7.0 Hz), 7.37 (d, 2H, *J* = 7.0 Hz), 5.87 (s, 1H), 3.16 – 3.07 (m, 2H), 2.56 (t, 2H, *J* = 6.5 Hz), 2.47 (t, 2H, *J* = 6.5 Hz), 2.14 – 2.0 (m, 4H), 1.88 – 1.82 (m, 2H); <sup>13</sup>C NMR (125 MHz, CDCl<sub>3</sub>): δ 199.2 (C), 166.3 (C), 143.8 (C), 133.3 (C), 128.6 (CH), 128.6 (CH), 124.4 (CH), 115.7 (C), 111.3 (CH), 39.0 (CH<sub>2</sub>), 36.6 (CH<sub>2</sub>), 35.9 (CH<sub>2</sub>), 29.9 (C), 28.4 (CH<sub>2</sub>), 20.7 (CH<sub>2</sub>), 14.2 (CH<sub>2</sub>); HRMS (ESI) *m/z* 267.1389 ([M+H]<sup>+</sup> C<sub>18</sub>H<sub>19</sub>O<sub>2</sub> requires 267.1385)

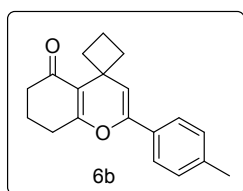

### 2-(*p*-tolyl)-7,8-dihydrospiro[chromene-4,1'-cyclobutan]-5(6*H*)-one (6b)

White solid compound. Mp: 128-129 °C. Yield: 77%. <sup>1</sup>H NMR (500 MHz, CDCl<sub>3</sub>): δ 7.47 (d, 2H, *J* = 8.0 Hz), 7.17 (d, 2H, *J* = 8.0 Hz), 5.79 (s, 1H), 3.11 - 3.05 (m, 2H), 2.53 (t, 2H, *J* = 6.0 Hz), 2.44 (t, 2H, *J* = 6.0 Hz), 2.36 (s, 3H), 2.10 – 1.95 (m, 4H), 1.85 – 1.78 (m, 2H); <sup>13</sup>C NMR (125 MHz, CDCl<sub>3</sub>): δ 198.9 (C), 166.1 (C), 143.5 (C), 138.3 (C), 130.2 (C), 129.0 (CH), 124.0 (CH), 115.4 (C), 110.2 (CH), 38.7 (CH<sub>2</sub>), 36.3 (CH<sub>2</sub>), 35.6 (CH<sub>2</sub>), 29.6 (C), 28.1

(CH<sub>2</sub>), 21.1 (CH<sub>2</sub>), 20.4 (CH<sub>3</sub>), 13.9 (CH<sub>2</sub>); HRMS (ESI) *m/z* 281.1563 ([M+H]<sup>+</sup> C<sub>19</sub>H<sub>21</sub>O<sub>2</sub> requires 281.1542).

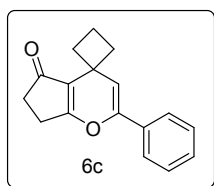

### 2'-phenyl-6',7'-dihydro-5'*H*-spiro[cyclobutane-1,4'-cyclopenta[b]pyran]-5'-one (6c)

White solid compound. Mp: 100-101 °C. Yield: 82%. <sup>1</sup>H NMR (500 MHz, CDCl<sub>3</sub>): δ 7.57 – 7.53 (m, 2H), 7.35 – 7.27 (m, 3H), 5.79 (s, 1H), 2.85 – 2.77 (m, 2H), 2.61 – 2.57 (m, 2H), 2.45 – 2.41 (m, 2H), 2.09 - 1.82 (m, 4H); <sup>13</sup>C NMR (125 MHz, CDCl<sub>3</sub>): δ 204.4 (C), 178.3 (C), 146.5 (C), 133.1 (C), 129.0 (CH), 128.7 (CH), 124.8 (CH), 119.7 (C), 110.5 (CH), 35.8 (CH<sub>2</sub>), 35.6 (CH<sub>2</sub>), 34.0 (CH<sub>2</sub>), 29.9 (C), 25.2 (CH<sub>2</sub>), 15.2 (CH<sub>2</sub>); HRMS (ESI) *m/z* 253.1218 ([M+H]<sup>+</sup> C<sub>17</sub>H<sub>17</sub>O<sub>2</sub> requires 253.1229).

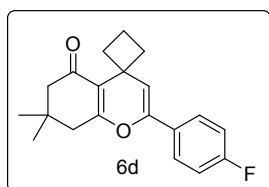

### 2-(4-fluorophenyl)-7,7-dimethyl-7,8-dihydrospiro[chromene-4,1'-cyclobutan]-5(6*H*)-one (6d)

White solid compound. Mp: 124-125 °C. Yield: 73%. <sup>1</sup>H NMR (500 MHz, CDCl<sub>3</sub>): δ 7.58 – 7.53 (m, 2H), 7.10-7.03 (m, 2H), 5.78 (s, 1H), 3.11 – 3.03 (m, 2H), 2.40 (s, 2H), 2.31 (s, 2H), 2.12 – 2.01 (m, 2H), 1.87 – 1.79 (m, 2H), 1.11 (s, 6H); <sup>13</sup>C NMR (125 MHz, CDCl<sub>3</sub>): δ 199.0 (C), 164.3 (C), 162.9 (d, C, *J* = 246.5 Hz), 143.1 (C), 129.4 (C), 126.3 (d, CH, *J* = 8.75 Hz), 115.5 (d, CH, *J* = 21.25 Hz), 114.5 (C), 111.0 (CH), 52.7 (CH<sub>2</sub>), 42.0 (CH<sub>2</sub>), 36.6 (CH<sub>2</sub>), 35.7 (CH<sub>2</sub>), 31.8 (C), 29.9 (C), 28.4 (CH<sub>3</sub>), 28.4 (CH<sub>3</sub>), 14.2 (CH<sub>2</sub>); HRMS (ESI) *m/z* 313.1599 ([M+H]<sup>+</sup> C<sub>20</sub>H<sub>22</sub>O<sub>2</sub>F requires 313.1604).

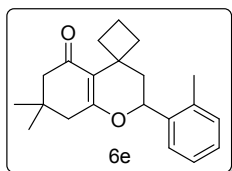

**7,7-dimethyl-2-(o-tolyl)-2,3,7,8-tetrahydrospiro[chromene-4,1'-cyclobutan]-5(6H)-one (6e)**

White solid compound. Mp: 110-111 °C. Yield: 80%. <sup>1</sup>H NMR (500 MHz, CDCl<sub>3</sub>): δ 7.31 (d, 1H, *J* = 7.5 Hz), 7.16 – 7.02 (m, 3H), 4.83 (d, 1H, *J* = 10.5 Hz), 3.10 (q, 1H, *J* = 10.5 Hz), 2.6 (q, 1H, *J* = 10.5 Hz), 2.24 (s, 3H), 2.19-2.15 (m, 4H), 2.02 - 1.79 (m, 4H), 1.75 – 1.51 (m, 2H), 0.95 (s, 3H), 0.94 (s, 3H); <sup>13</sup>C NMR (125 MHz, CDCl<sub>3</sub>): δ 197.9 (C), 169.4 (C), 137.8 (C), 134.4 (C), 130.4 (CH), 127.8 (CH), 126.2 (CH), 125.4 (CH), 115.9 (C), 73.7 (CH), 51.9 (CH<sub>2</sub>), 44.0 (CH<sub>2</sub>), 42.6 (CH<sub>2</sub>), 36.2 (CH<sub>2</sub>), 33.4 (C), 31.2 (CH<sub>2</sub>), 30.3 (C), 29.1 (CH<sub>3</sub>), 27.1 (CH<sub>3</sub>), 18.8 (CH<sub>3</sub>), 14.3 (CH<sub>2</sub>); HRMS (ESI) *m/z* 311.2017 ([M+H]<sup>+</sup> C<sub>21</sub>H<sub>27</sub>O<sub>2</sub> requires 311.2011).

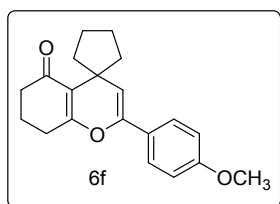

**2-(4-methoxyphenyl)-7,8-dihydrospiro[chromene-4,1'-cyclopentan]-5(6H)-one (6f)**

Yellow semi-solid compound. Yield: 83%. <sup>1</sup>H NMR (500 MHz, CDCl<sub>3</sub>): δ 7.41 (d, 2H, *J* = 9.0 Hz), 6.82 (d, 2H, *J* = 9.0 Hz), 5.24 (s, 1H), 3.76 (s, 3H), 2.49 (t, 2H, *J* = 6.5 Hz), 2.34 (t, 2H, *J* = 6.5 Hz), 2.25 – 2.17 (m, 2H), 1.99 – 1.92 (m, 4H), 1.89 – 1.84 (m, 2H), 1.66 – 1.63 (m, 2H); <sup>13</sup>C NMR (125 MHz, CDCl<sub>3</sub>): δ 198.4 (C), 166.4 (C), 159.6 (C), 141.8 (C), 135.1 (C), 125.5 (CH), 116.2 (C), 113.6 (CH), 109.6 (C), 55.2 (CH<sub>3</sub>), 42.2 (CH<sub>2</sub>), 38.8 (CH<sub>2</sub>), 38.8

(CH<sub>2</sub>), 32.1 (C), 28.3 (CH<sub>2</sub>), 26.2 (CH<sub>2</sub>), 20.5 (CH<sub>2</sub>), 14.0 (CH<sub>2</sub>); HRMS (ESI) *m/z* 311.2939 ([M+H]<sup>+</sup> C<sub>21</sub>H<sub>23</sub>O<sub>3</sub> requires 311.1647).

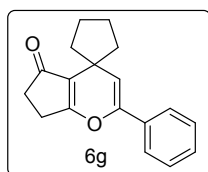

### 2'-phenyl-6',7'-dihydro-5'H-spiro[cyclopentane-1,4'-cyclopenta[b]pyran]-5'-one (6g)

Yellow solid compound. Mp: 191-192 °C. Yield: 85%. <sup>1</sup>H NMR (500 MHz, CDCl<sub>3</sub>): δ 7.62 – 7.58 (m, 2H), 7.41 – 7.33 (m, 3H), 5.49 (s, 1H), 2.70 – 2.66 (m, 2H), 2.50 – 2.46 (m, 2H), 2.25 – 2.13 (m, 2H), 1.94 – 1.88 (m, 2H), 1.78 – 1.73 (m, 2H), 1.58-1.51 (m, 2H); <sup>13</sup>C NMR (125 MHz, CDCl<sub>3</sub>): δ 203.7 (C), 178.4 (C), 145.1 (C), 133.0 (C), 128.5 (CH<sub>2</sub>), 128.3 (CH<sub>2</sub>), 124.5 (CH<sub>2</sub>), 120.1 (C), 110.2 (CH), 40.8 (CH<sub>2</sub>), 39.7 (CH<sub>2</sub>), 33.6 (CH<sub>2</sub>), 29.6 (C), 25.3 (CH<sub>2</sub>), 25.0 (CH<sub>2</sub>), 14.0 (CH<sub>2</sub>); HRMS (ESI) *m/z* 267.1630 ([M+H]<sup>+</sup> C<sub>18</sub>H<sub>19</sub>O<sub>2</sub> requires 267.1385).

### References:

1. S. Bao, K. Li, P. Ning, J. Peng, X. Jin, L. Tang, *Appl. Surf. Sci.*, 2017, 393, 457.
2. J. Safari, Z. Zarnegar, *RSC Adv.* **2015**, 5, 17738.
3. M. Kazemnejadi, S. A. Alavi G., Z. Rezazadeh, M. A. Nasser, A. Allahresani, M. Esmailpour, *Appl. Organometal. Chem.* 2019, 34, 1.
4. Q. Li, X. Hu, W. Li, F. Yang, X. Yang, L. Sun, L. Zhou, J. Qi, Y. Yu, *J. Chem. Res.* 2008, 331
5. S. Yaragorla, P. L. Saini, G. Singh, *Tetrahedron Lett.* 2015, 56, 1649
6. S. R. Sarda, V. A. Puri, A. B. Rode, T. N. Dalawe, W. N. Jadhav, R. P. Pawar, *Arkivoc*, 2007, xvi, 246
7. V. G. Kharchenko, L. I. Markova, N. S. Smirnova, K. M. Korshunova, G. I. Rybina, *Zh. Org. Khim.* 1982, 18, 2184

# Spectra

26777  
MS-76-1  
26777

7.599  
7.596  
7.585  
7.582  
7.580  
7.368  
7.353  
7.348  
7.344  
7.341  
7.330  
7.337  
7.335  
7.296  
7.281  
7.265  
7.193  
7.191  
7.188  
7.186  
7.184  
7.164  
7.162  
5.718  
5.708  
4.530  
4.520  
2.737  
2.712  
2.702  
2.691  
2.579  
2.667  
2.660  
2.650  
2.396  
2.384  
2.375  
2.365  
2.071  
2.060  
2.048  
2.039

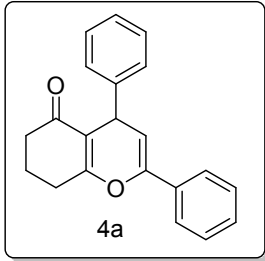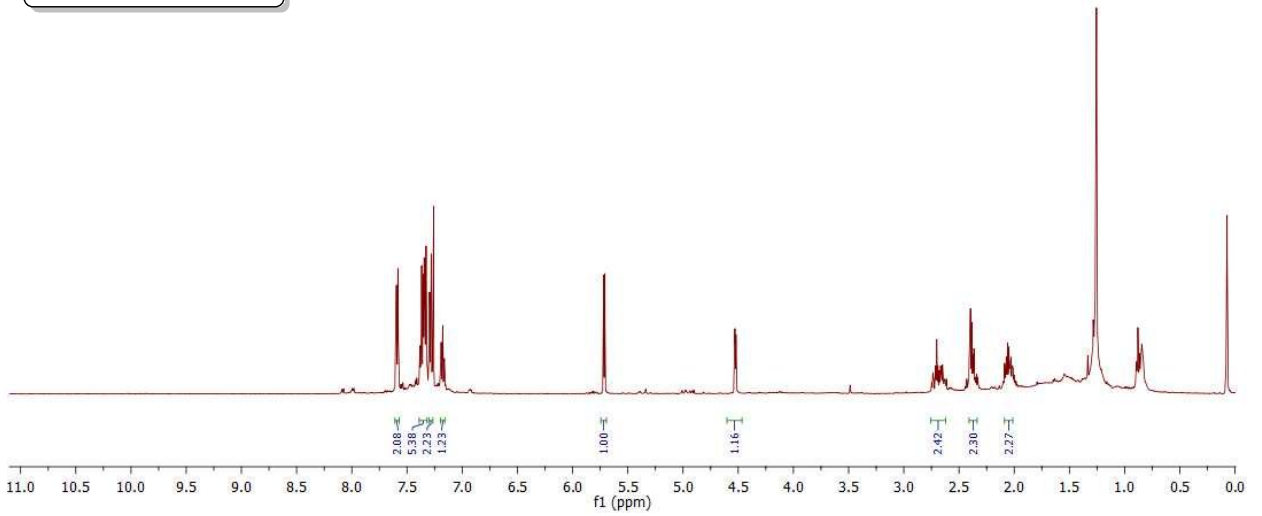

26778  
MS-76-1  
26778

197.73  
166.60  
147.02  
145.42  
133.14  
128.96  
128.63  
128.61  
128.40  
126.77  
124.67  
114.02  
104.71  
77.48  
76.97  
37.28  
35.97  
27.96  
20.62

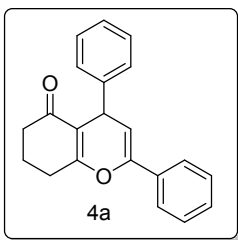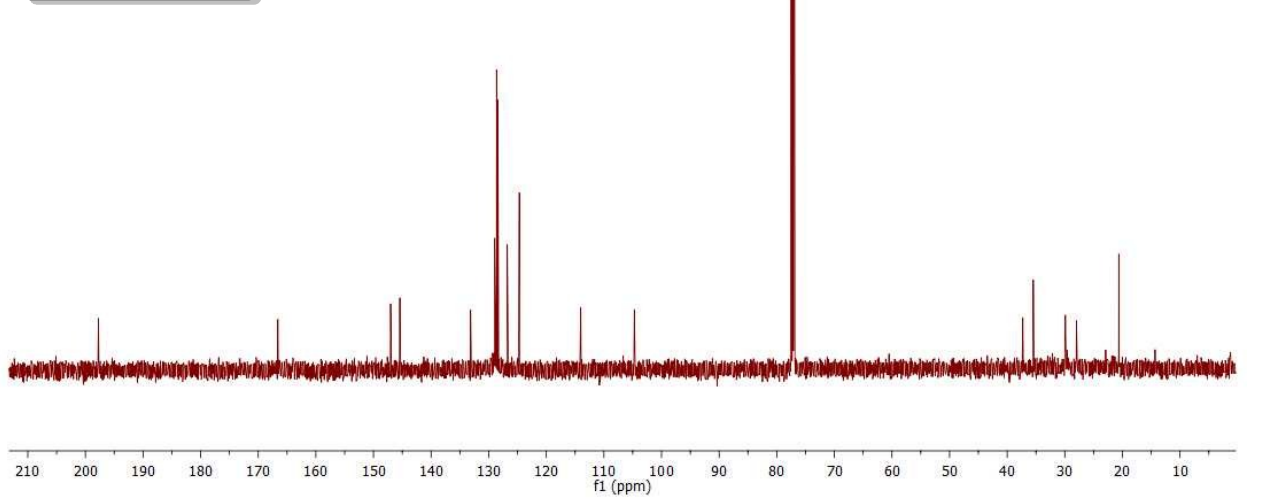

26429  
26429  
MS-77-2

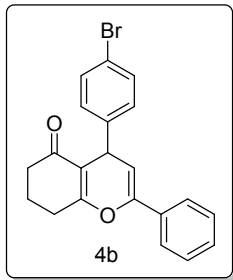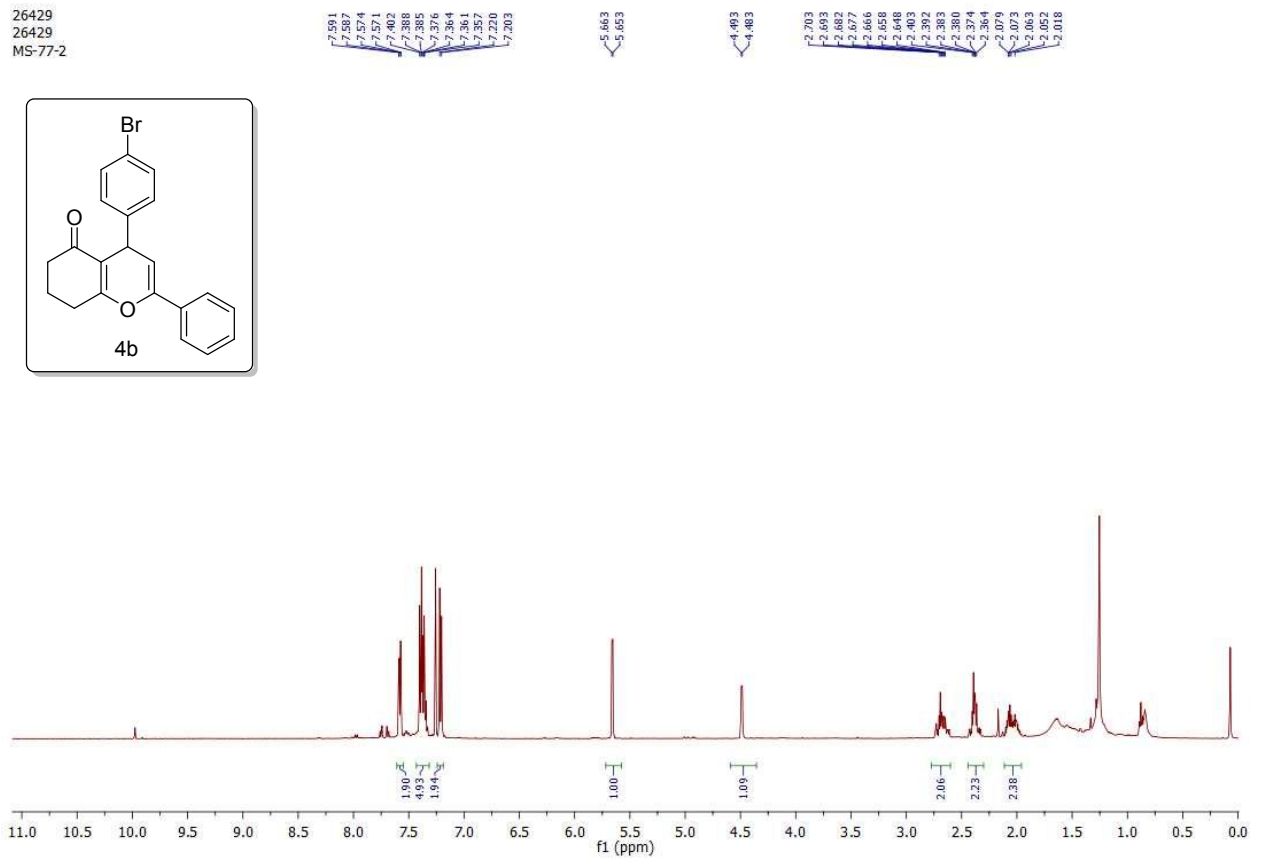

26430  
26430  
MS-77-2

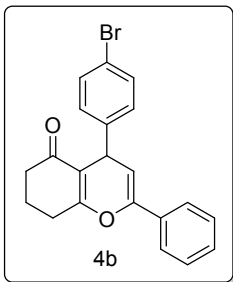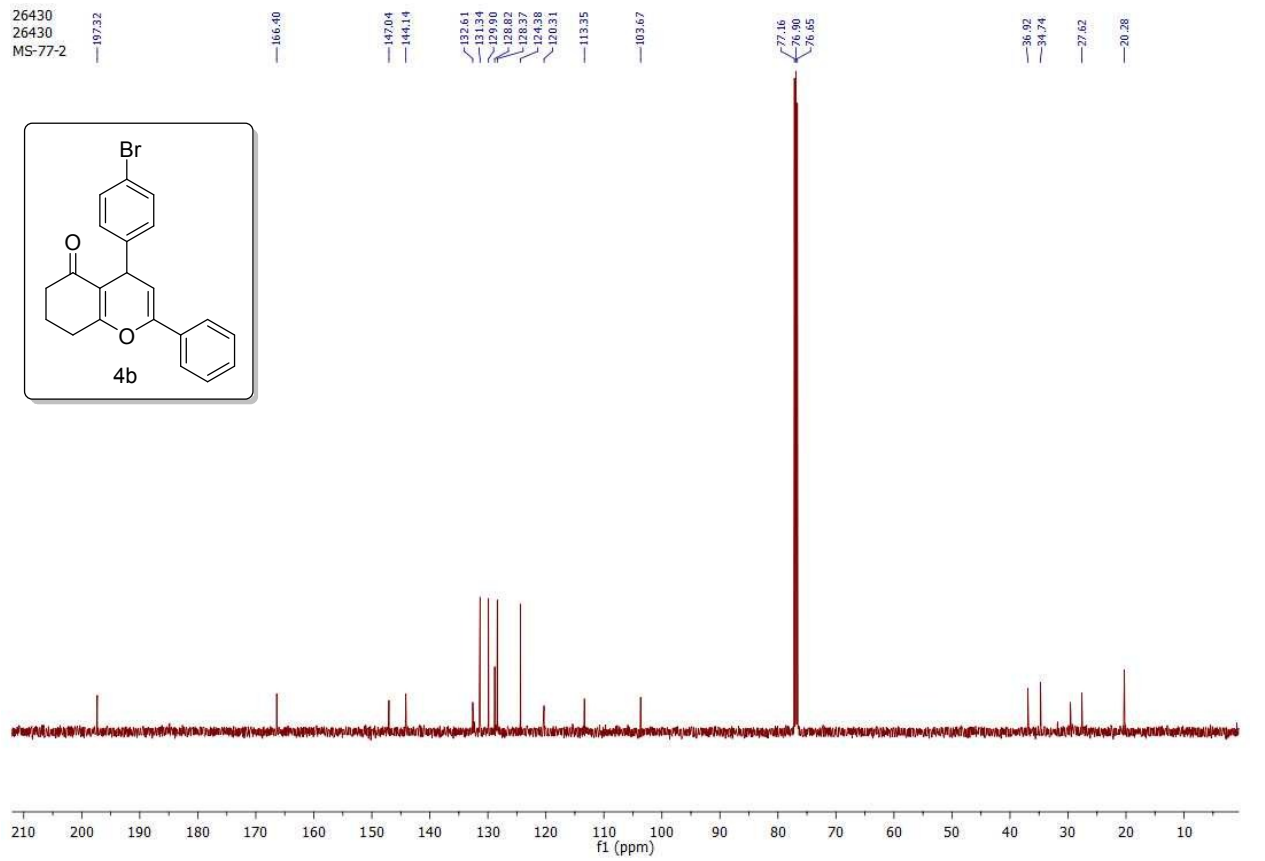

26431  
26431  
MS-77-3

7.853  
7.837  
7.827  
7.806  
7.603  
7.590  
7.587  
7.553  
7.488  
7.473  
7.387  
7.381  
7.378  
7.375  
7.360  
7.354  
7.311  
7.308  
7.295  
7.280  
7.278  
5.886  
5.877  
5.103  
5.095

2.749  
2.738  
2.728  
2.720  
2.710  
2.704  
2.693  
2.375  
2.360  
2.349  
2.105  
2.094  
2.082  
2.075  
2.062  
2.047

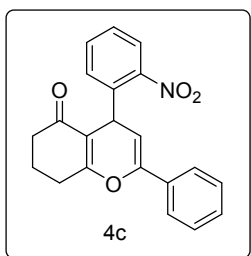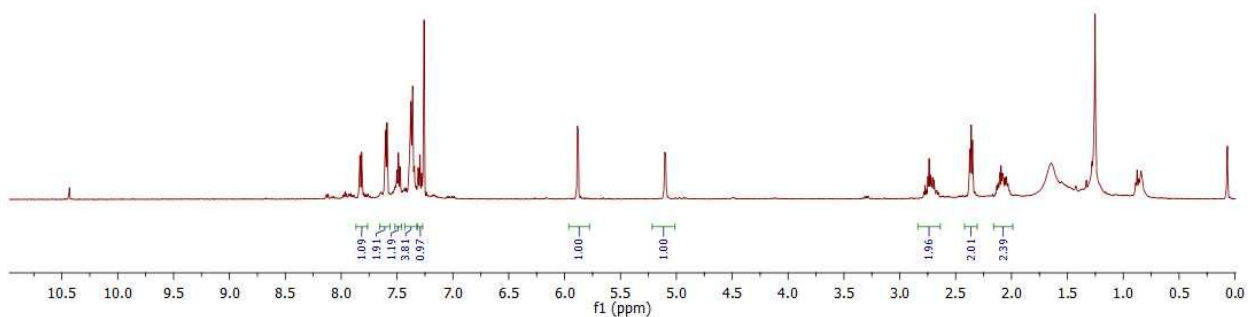

26432  
26432  
MS-77-3

197.13  
167.54  
149.40  
147.66  
139.92  
133.15  
132.82  
130.67  
129.25  
128.69  
127.37  
124.75  
124.27  
112.89  
102.99  
77.48  
76.97  
36.93  
31.11  
27.85  
20.67

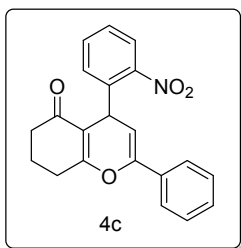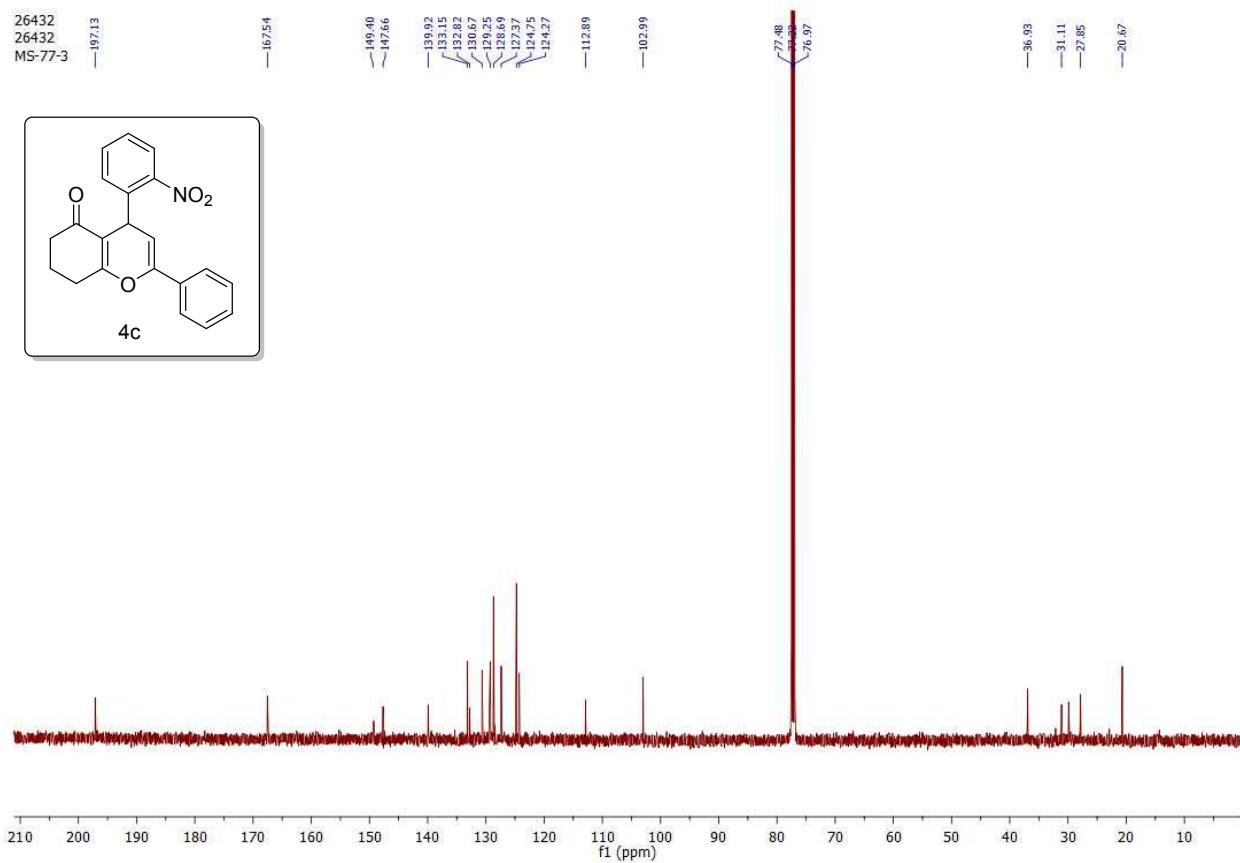



26484.1.fid  
26484  
MS-78-1

7.559  
7.555  
7.546  
7.542  
7.539  
7.377  
7.374  
7.366  
7.365  
7.363  
7.350  
7.345  
7.341  
7.337  
7.333  
7.329  
7.326  
7.260  
7.164  
7.159  
7.143  
7.089  
7.082  
5.885  
5.675  
4.931  
4.922  
2.786  
2.762  
2.751  
2.740  
2.729  
2.726  
2.718  
2.715  
2.712  
2.709  
2.701  
2.698  
2.683  
2.666  
2.651  
2.631  
2.495  
2.419  
2.408  
2.175  
2.171  
2.160  
2.156  
2.151  
2.144  
2.138  
2.134  
2.117  
2.113  
2.105  
2.101  
2.095  
2.085  
2.079  
2.074

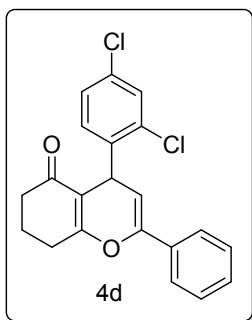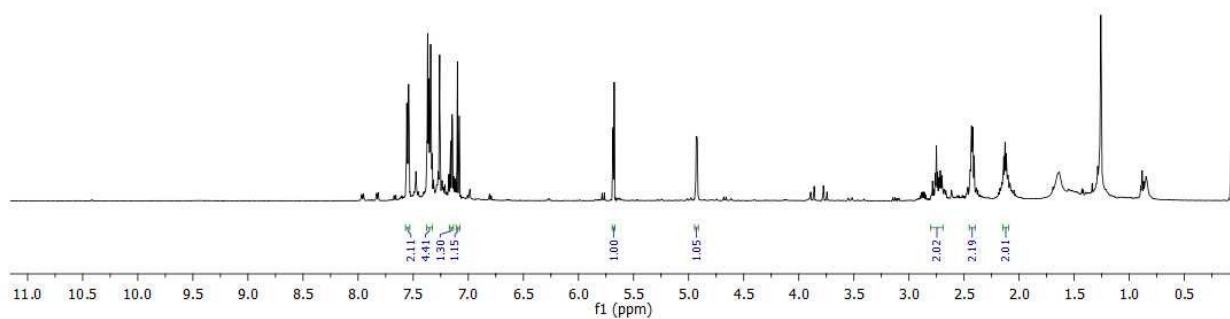

26485.1.fid  
26485  
MS-78-1

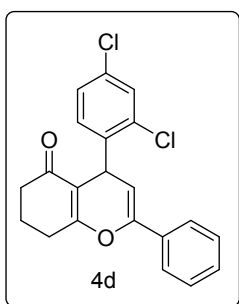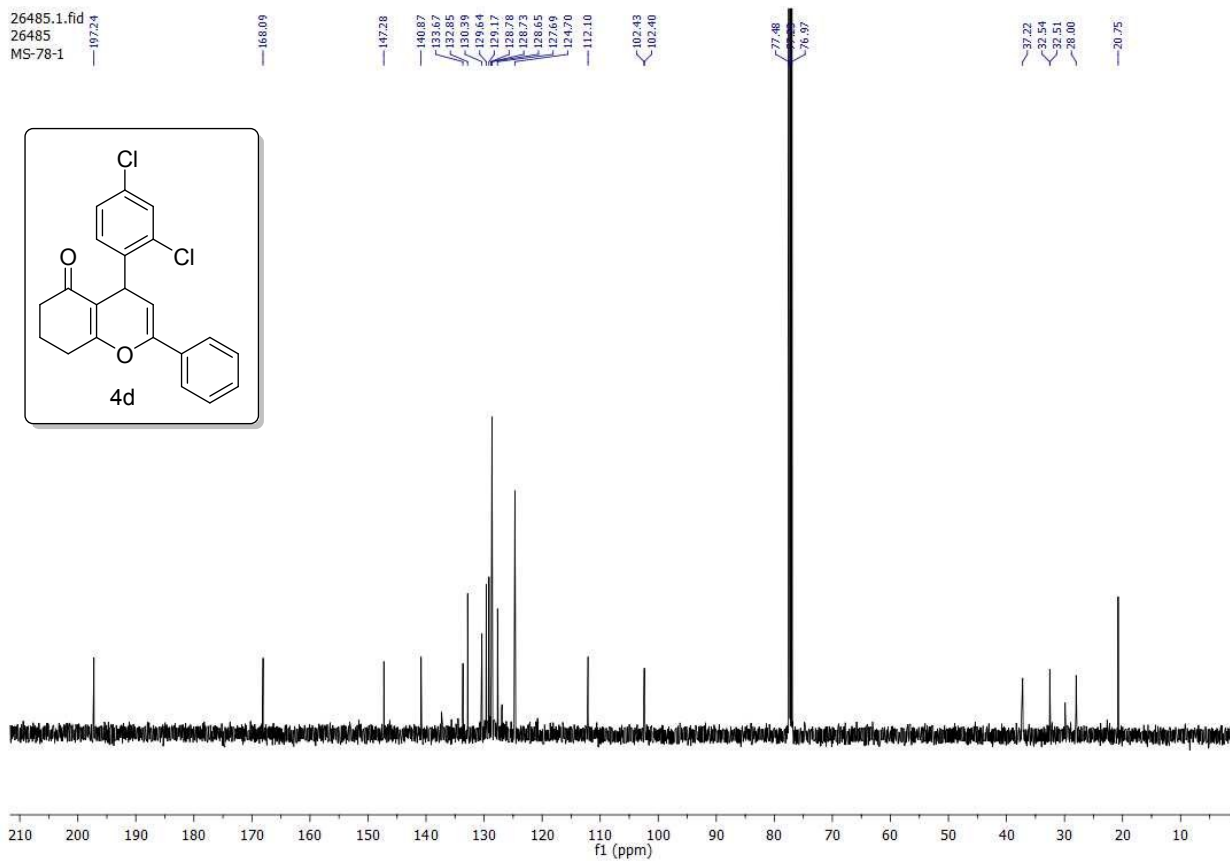

26486.1.fid  
26486  
MS-78-2

7.595  
7.592  
7.579  
7.576  
7.571  
7.568  
7.563  
7.559  
7.556  
7.546  
7.541  
7.534  
7.529  
7.524  
7.519  
7.515

5.669  
5.659

4.508  
4.499

2.731  
2.707  
2.696  
2.685  
2.679  
2.664  
2.651  
2.606  
2.595  
2.586  
2.577  
2.567  
2.076  
2.065  
2.054  
2.040  
2.032  
2.013  
2.002

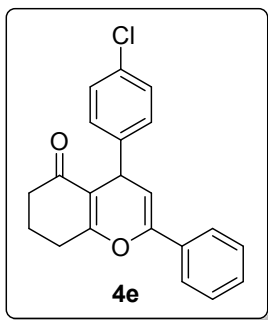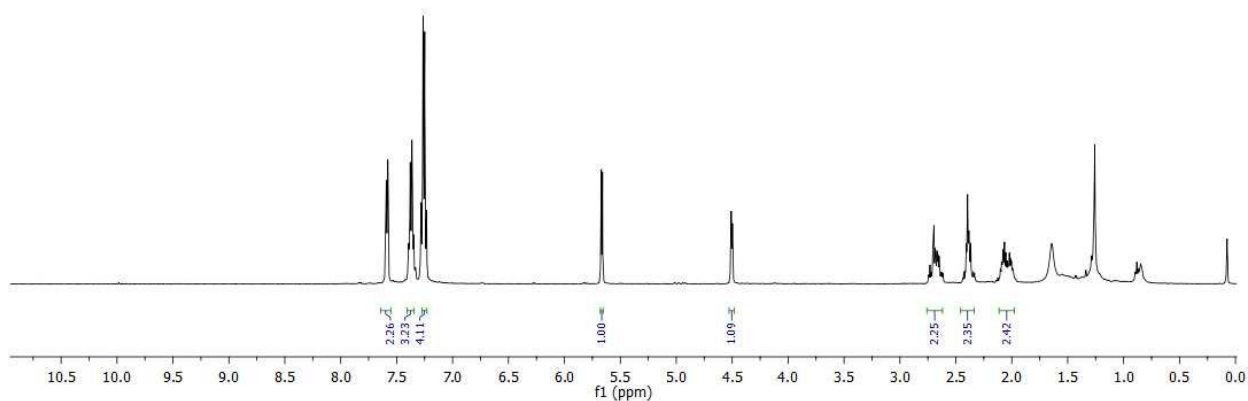

26487.1.fid  
26487  
MS-78-2

166.68

147.33  
143.93

132.84  
132.47  
129.81  
129.12  
128.70  
128.68  
124.69

113.74

104.09  
104.06

77.48  
77.23  
76.97

37.25  
34.99  
34.97

27.94

20.61

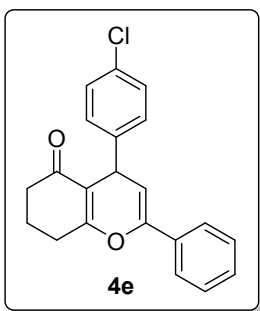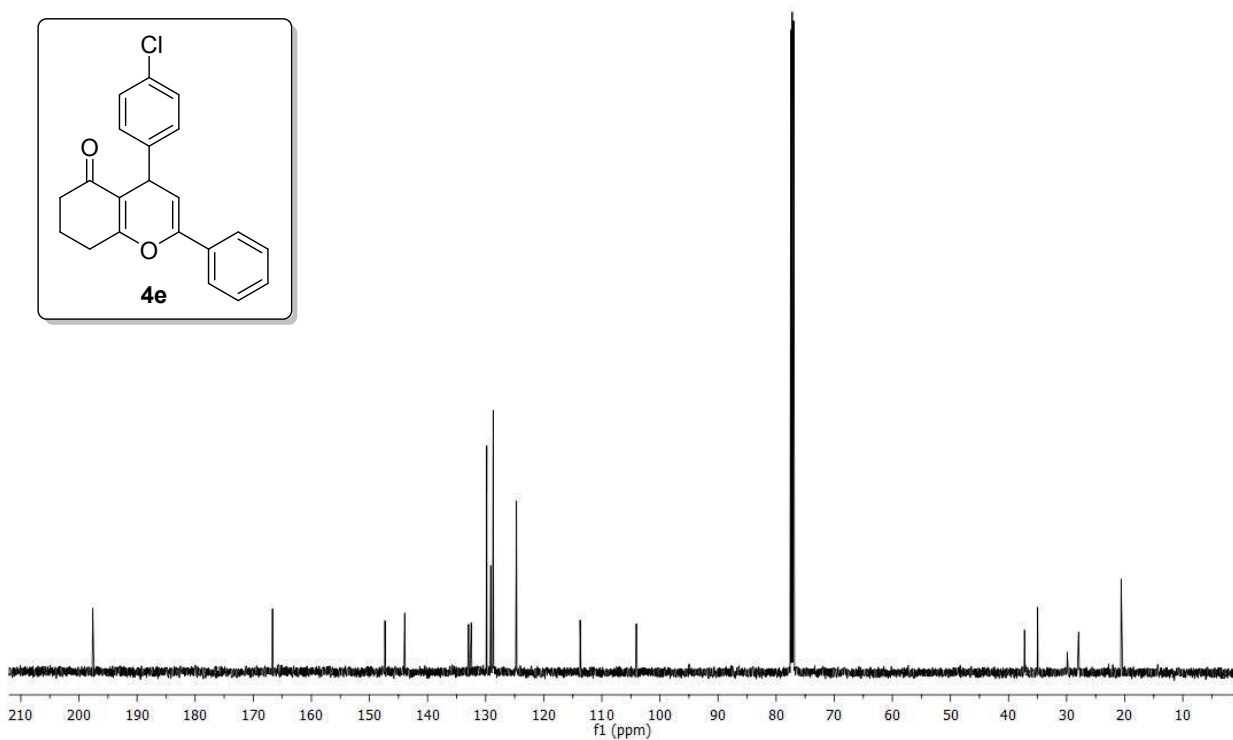

27181.1.fid  
27181  
MS-82-4

7.465  
7.449  
7.321  
7.318  
7.304  
7.302  
7.272  
7.240  
7.188  
7.154  
7.152  
7.142  
5.641  
5.631  
4.497  
4.495  
4.487  
4.485  
2.708  
2.684  
2.673  
2.663  
2.652  
2.641  
2.630  
2.623  
2.623  
2.383  
2.371  
2.360  
2.340  
2.061  
2.050  
2.045  
2.034  
2.023  
2.012  
1.903  
1.883

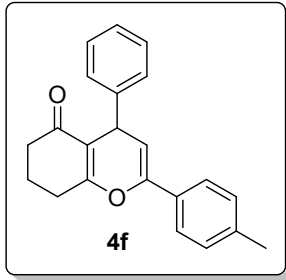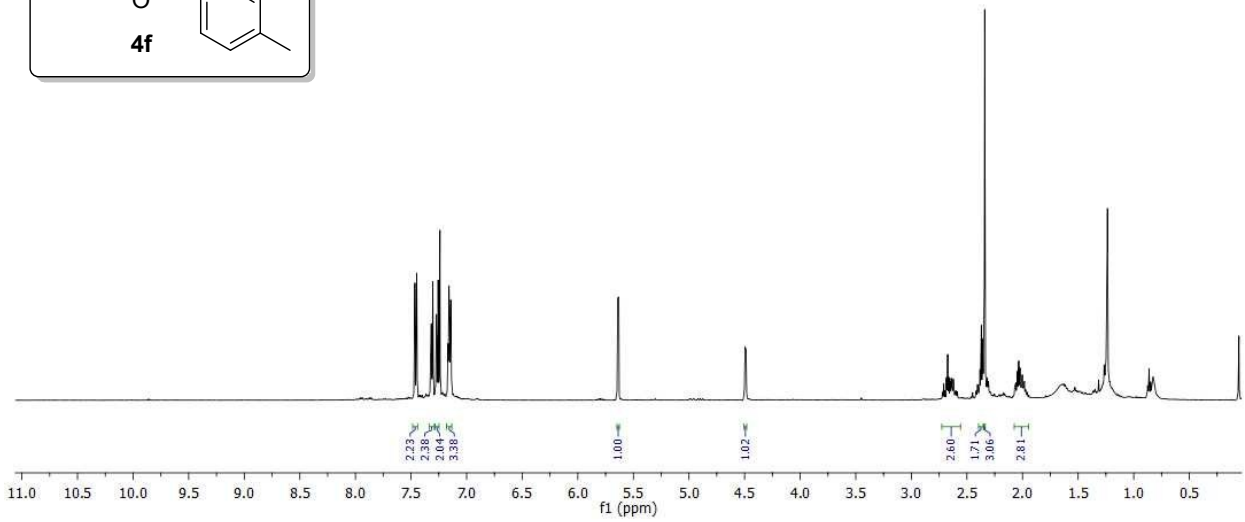

27182.5.fid  
27182  
MS-82-4

197.73  
166.63  
147.08  
145.57  
138.94  
130.34  
129.30  
128.56  
128.39  
126.70  
124.58  
114.04  
103.83  
77.48  
77.22  
76.97  
37.29  
35.43  
27.98  
21.45  
20.63

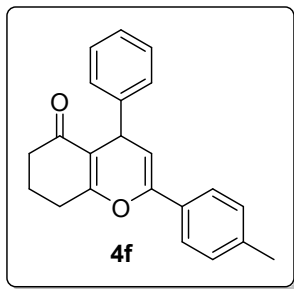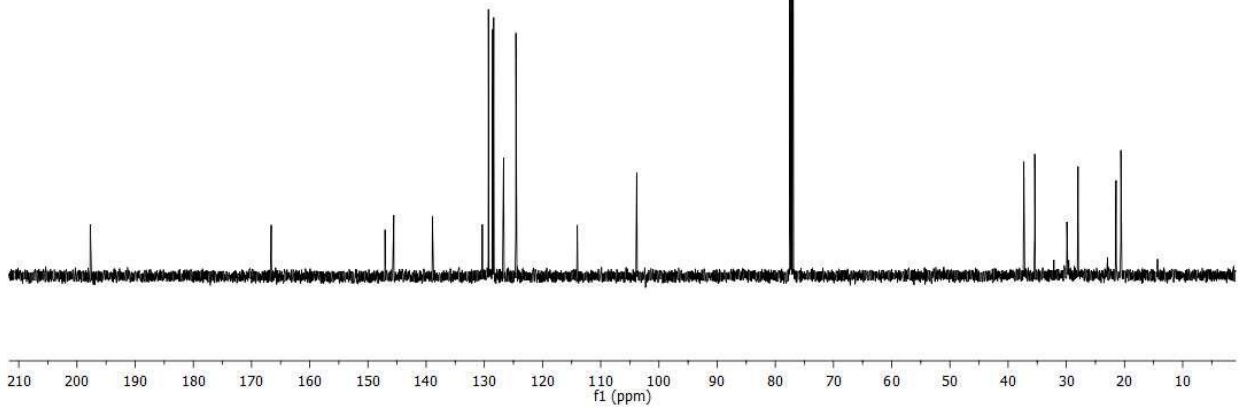

27183.1.fid  
27183  
MS-82-6

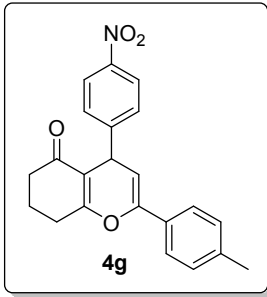

8.124  
8.107  
7.480  
7.467  
7.463  
7.449  
7.446  
7.240  
7.177  
7.161  
5.575  
5.566  
4.608  
4.598  
2.734  
2.709  
2.696  
2.686  
2.674  
2.672  
2.666  
2.656  
2.386  
2.375  
2.368  
2.362  
2.349  
2.090  
2.074  
2.065  
2.052  
2.008

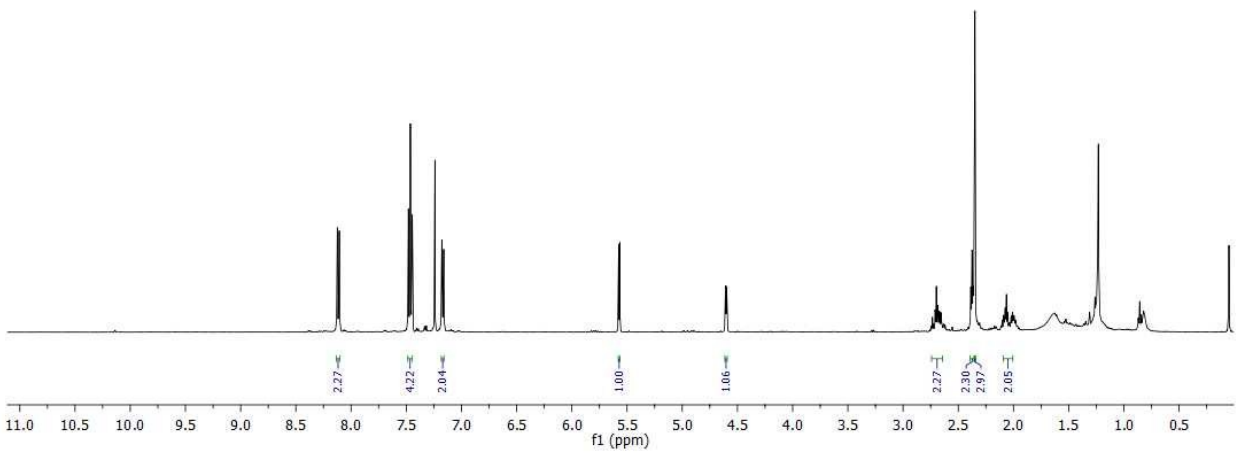

27184.5.fid  
27184  
MS-82-6

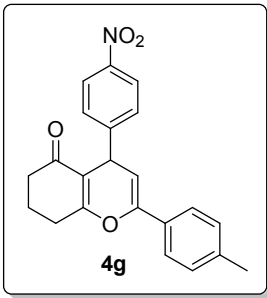

167.31  
152.82  
147.99  
146.81  
139.53  
129.79  
129.75  
129.75  
124.69  
123.95  
113.05  
102.08  
77.47  
77.22  
76.96  
37.16  
35.67  
27.97  
21.48  
20.57

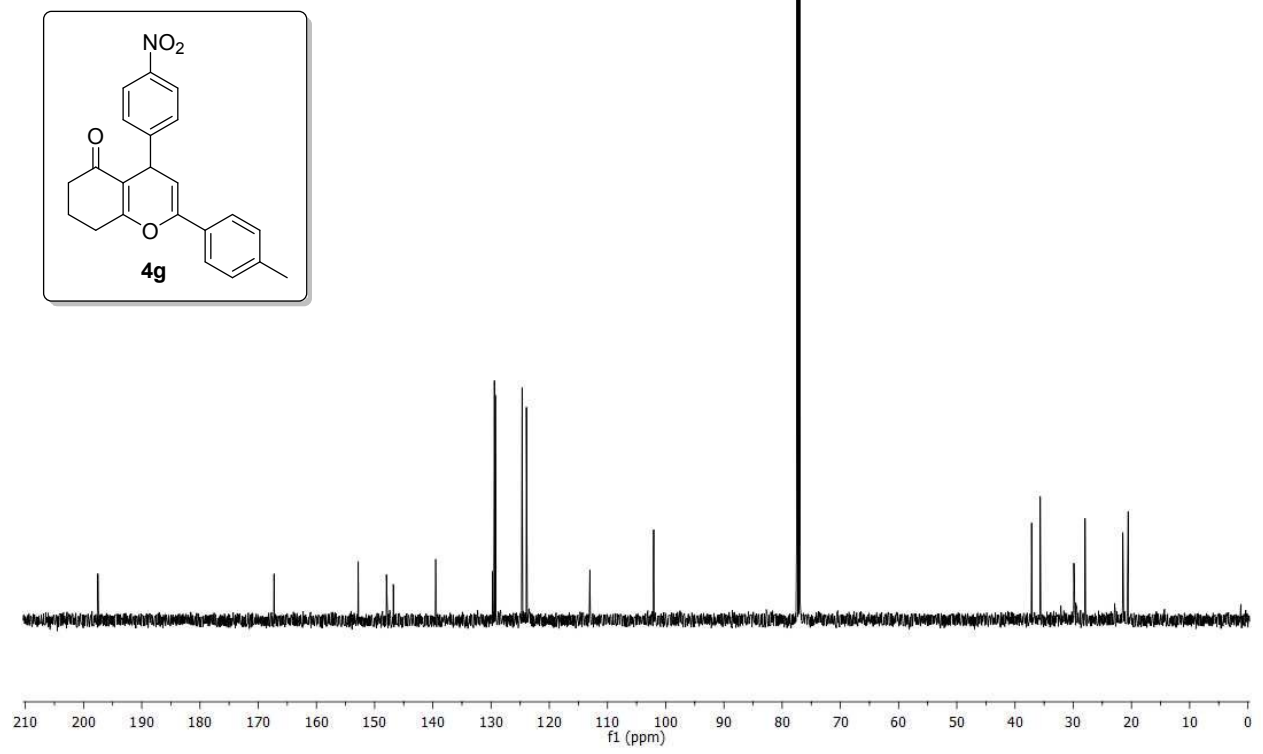

27186.1.fid  
27186  
MS-82-8

8.131 8.114 7.560 7.549 7.542 7.475 7.468 7.465 7.463 7.035 5.564 5.555 4.611 4.602 2.711 2.700 2.689 2.683 2.683 2.675 2.673 2.668 2.665 2.657 2.655 2.393 2.391 2.381 2.373 2.360 2.100 2.100 2.099 2.088 2.083 2.077 2.072 2.062 2.028 2.018 2.015 2.010 2.004 2.000

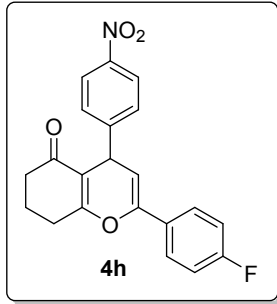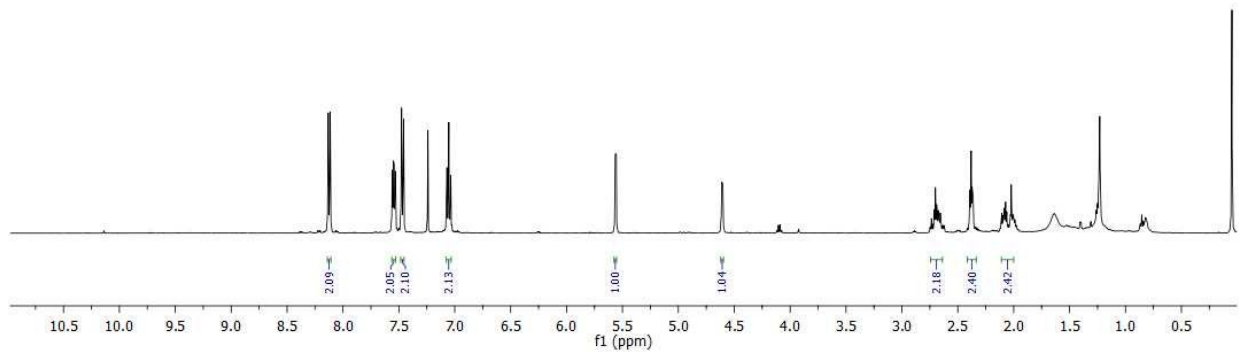

27187.5.fid  
27187  
MS-82-8

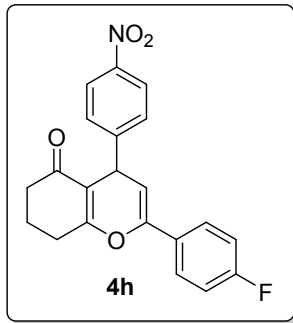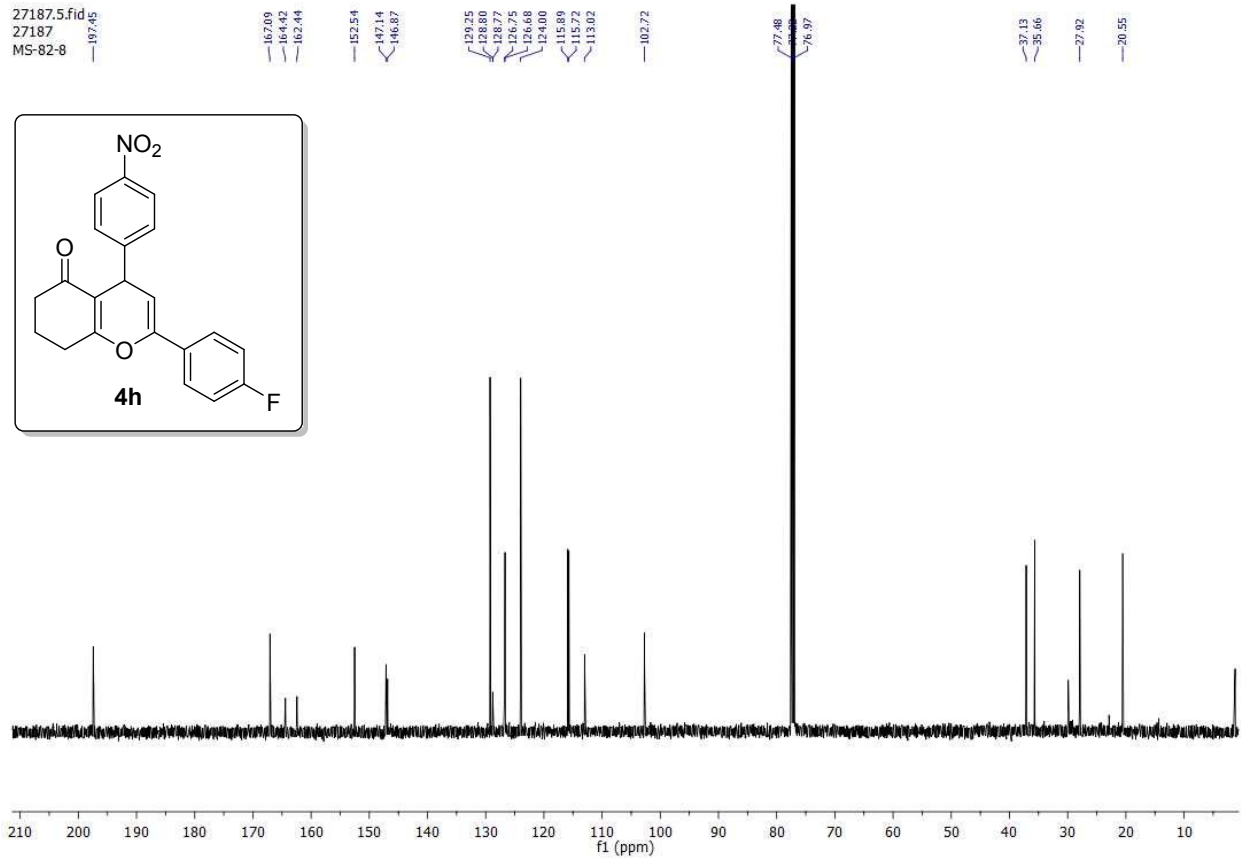

26482  
26482  
MS-77-4

7.483  
7.480  
7.467  
7.464  
7.347  
7.332  
7.315  
7.273  
7.269  
7.259  
7.244  
7.210

5.479  
5.469

3.7703  
3.689  
3.671  
3.664  
3.655  
3.646  
3.638  
3.052  
3.026  
3.020  
2.5500  
2.489  
2.484  
2.473  
2.040  
2.039  
2.016

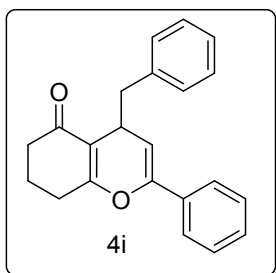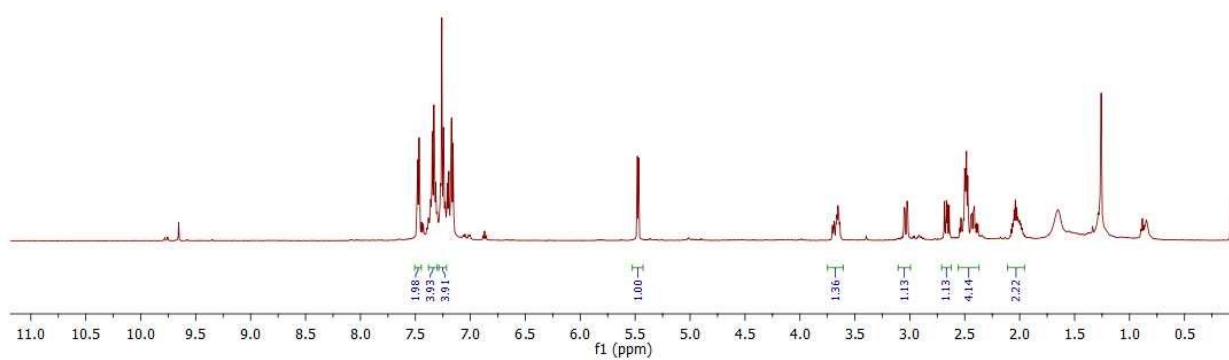

26483  
26483  
MS-77-4

198.41

167.91

147.96

139.09

133.39

129.96

128.59

128.18

126.26

124.62

113.37

103.92

77.49

76.98

62.89

37.45

31.22

27.86

20.74

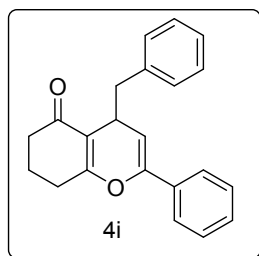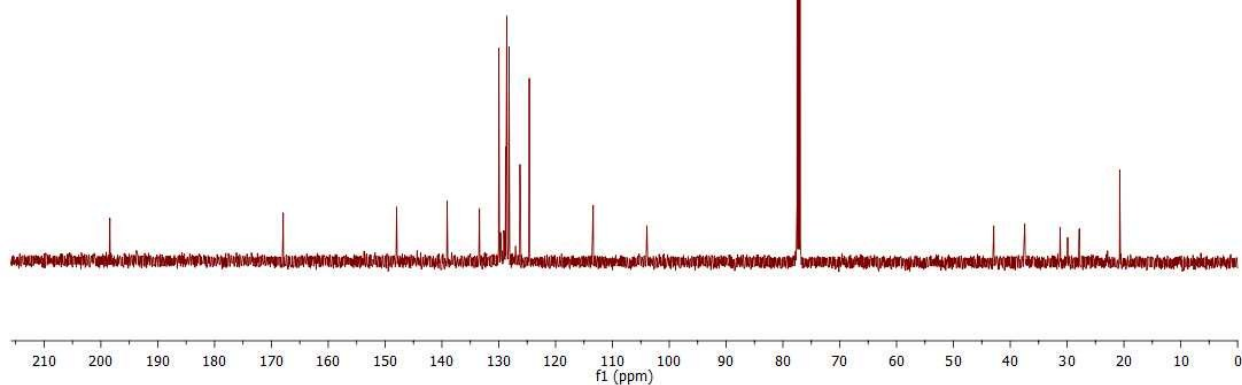

28002  
28002  
MS-78-3

7.619  
7.616  
7.602  
7.402  
7.389  
7.373  
7.366  
7.350  
7.278  
7.271  
7.254  
6.858  
6.840  
6.079  
6.069  
6.058  
6.045  
6.034  
5.922  
5.912  
5.712  
5.424  
5.421  
5.289  
5.287  
5.278  
4.503  
4.500  
4.497  
4.486  
3.740  
3.715  
2.705  
2.694  
2.685  
2.675  
2.667  
2.657  
2.423  
2.412  
2.399  
2.389  
2.378  
2.070  
2.066  
2.060  
2.049  
2.038  
2.029

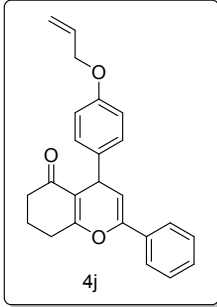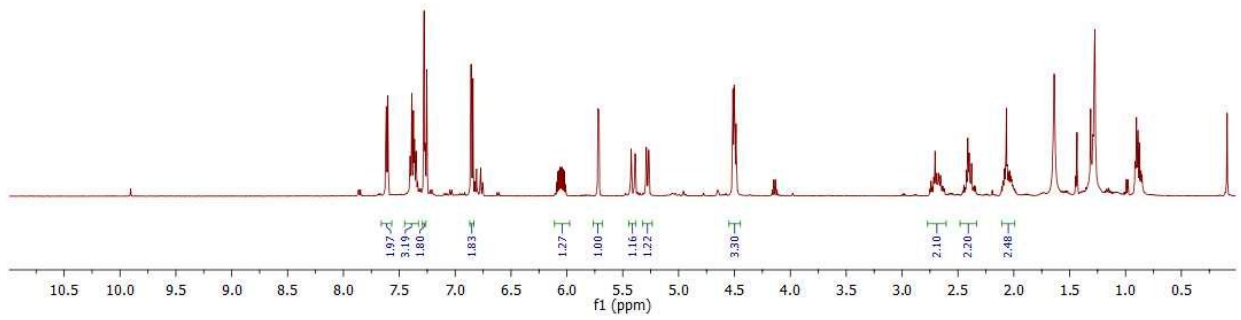

28003  
28003  
MS-78-3

197.83  
166.35  
157.51  
146.92  
137.01  
137.64  
133.20  
129.43  
128.91  
128.64  
124.64  
117.79  
114.78  
114.27  
104.82  
77.49  
76.98  
69.04  
37.32  
34.55  
27.95  
20.63

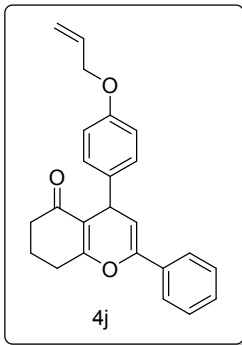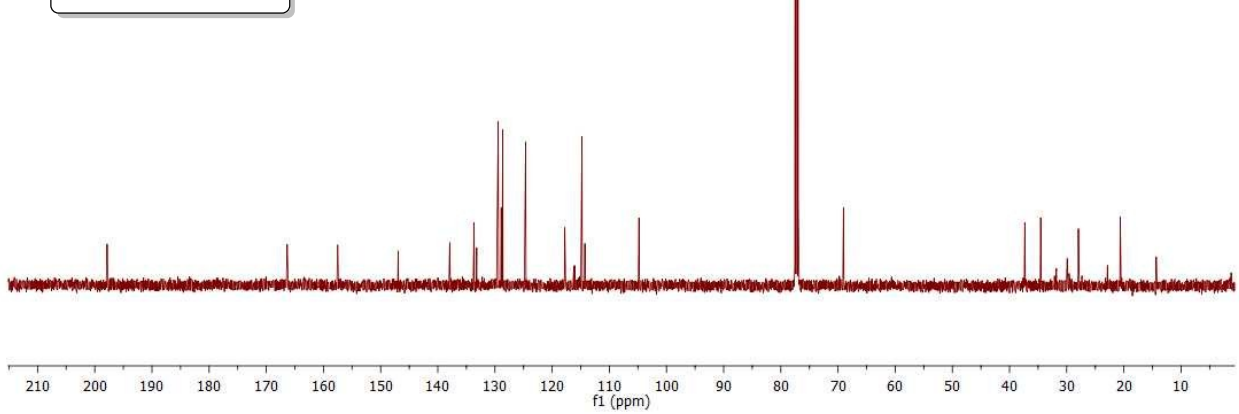

27836  
27836  
MS-80-1

7.666  
7.663  
7.649  
7.647  
7.493  
7.490  
7.405  
7.401  
7.388  
7.284  
7.283  
6.884  
6.887  
5.683  
5.674  
4.444  
4.437  
3.799  
2.820  
2.817  
2.808  
2.799  
2.796  
2.789  
2.515  
2.507  
2.501  
2.495  
2.487

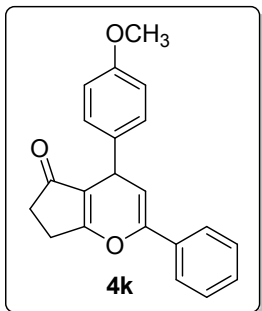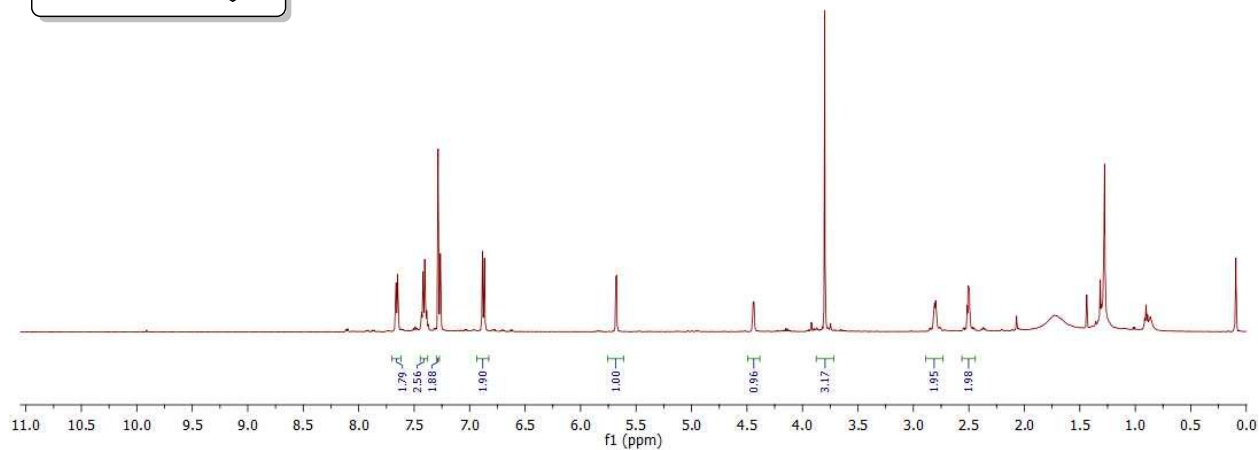

27837  
27837  
MS-80-1

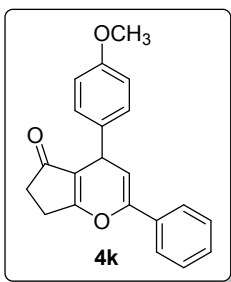

178.66  
158.75  
148.53  
135.60  
133.01  
129.38  
129.23  
128.74  
124.93  
117.55  
114.15  
104.32  
77.48  
76.97  
55.47  
34.99  
33.62  
25.82

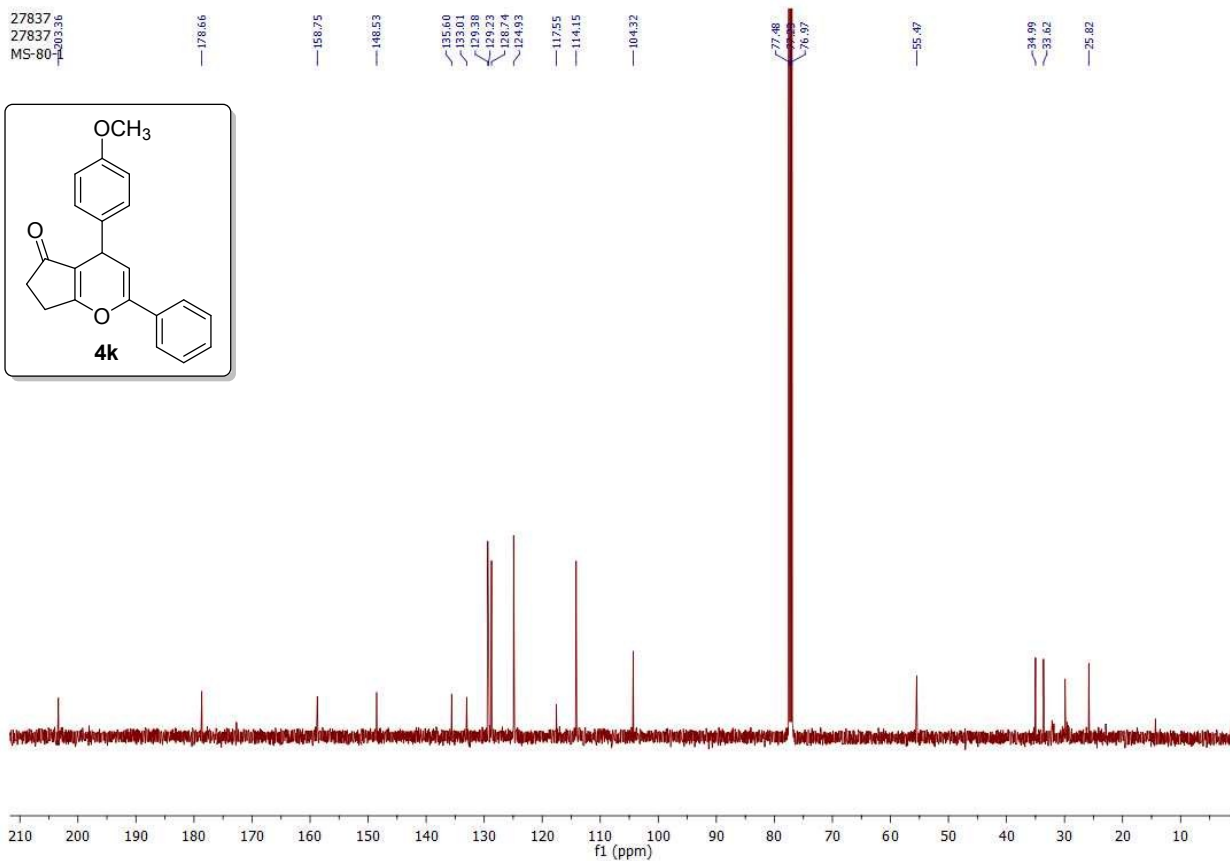



26784  
MS-80-3  
26784

7.506  
7.502  
7.490  
7.487  
7.359  
7.358  
7.349  
7.345  
7.341  
7.275  
7.259  
7.219  
7.204  
7.178  
7.176

5.431  
5.413

3.606  
3.596  
3.588  
3.320  
3.294  
3.285  
3.285  
2.719  
2.711  
2.693  
2.662  
2.653  
2.648  
2.645  
2.550  
2.547  
2.524  
2.515  
2.511

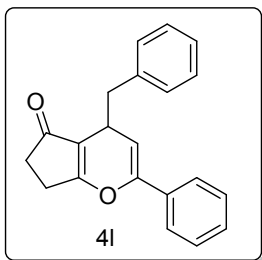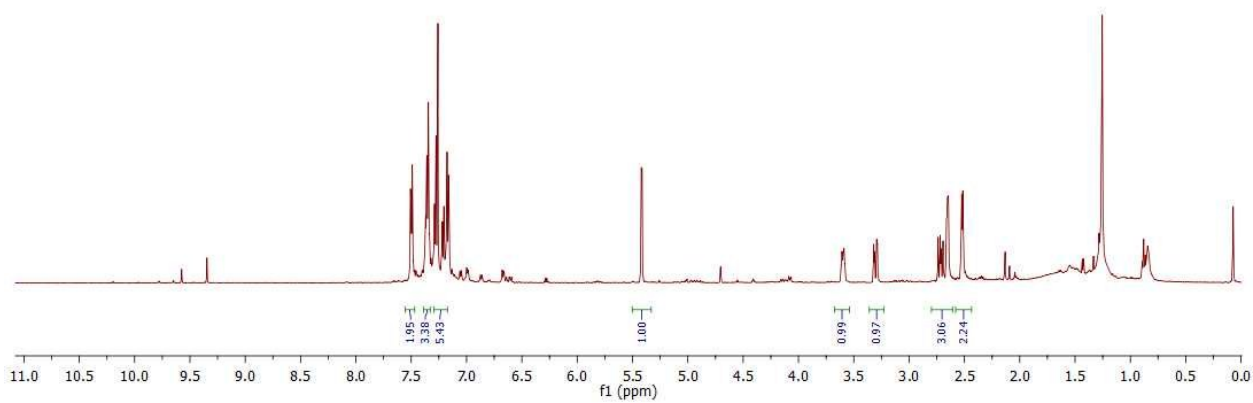

26785  
MS-80-3  
26785

204.28

180.19

149.05

138.56

133.17

129.84

129.10

128.66

128.41

126.43

124.88

117.06

103.65

103.59

77.48

76.98

41.23

33.65

31.84

25.71

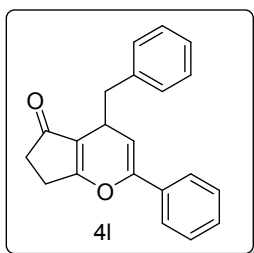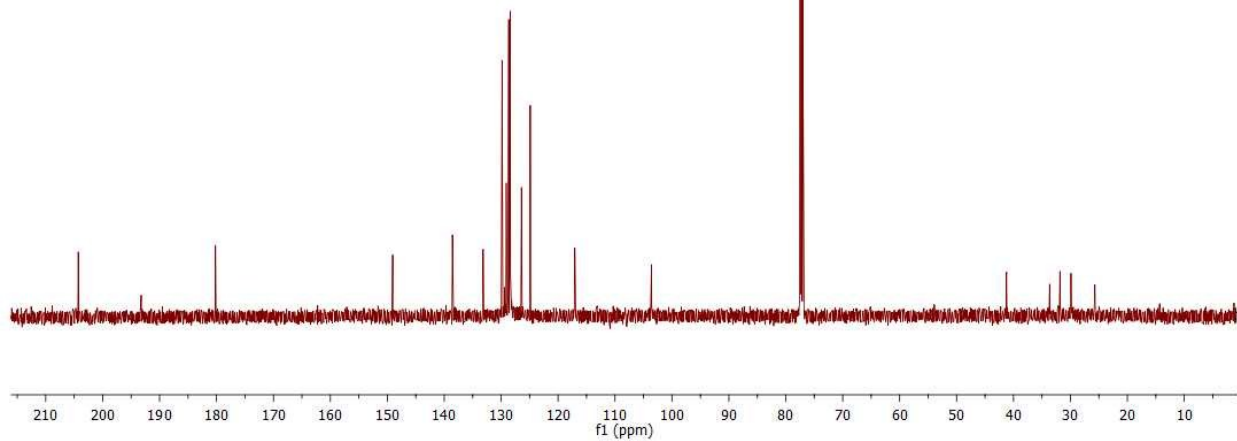

26884  
26884  
MS-81-1

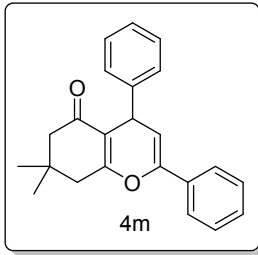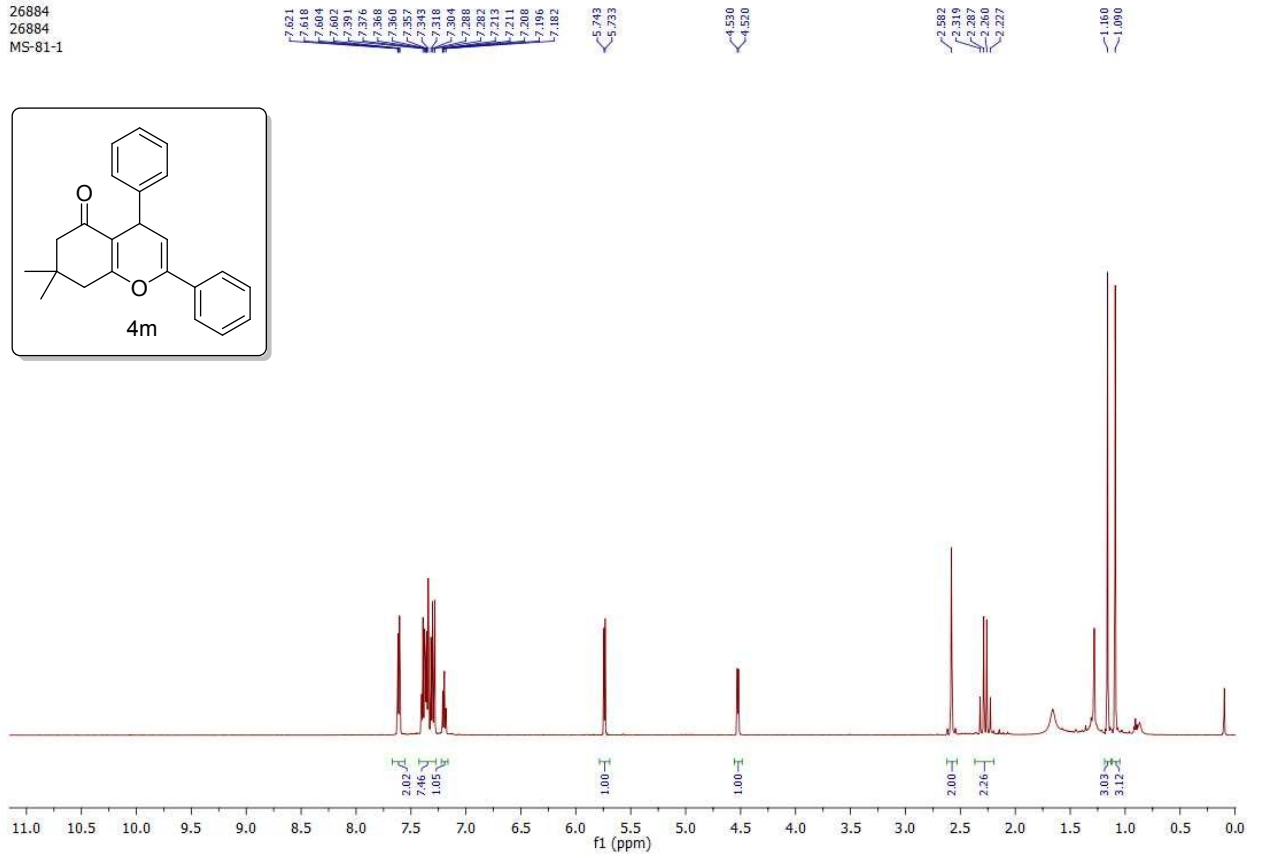

26885  
26885  
MS-81-1

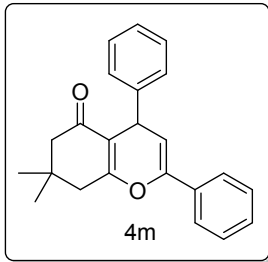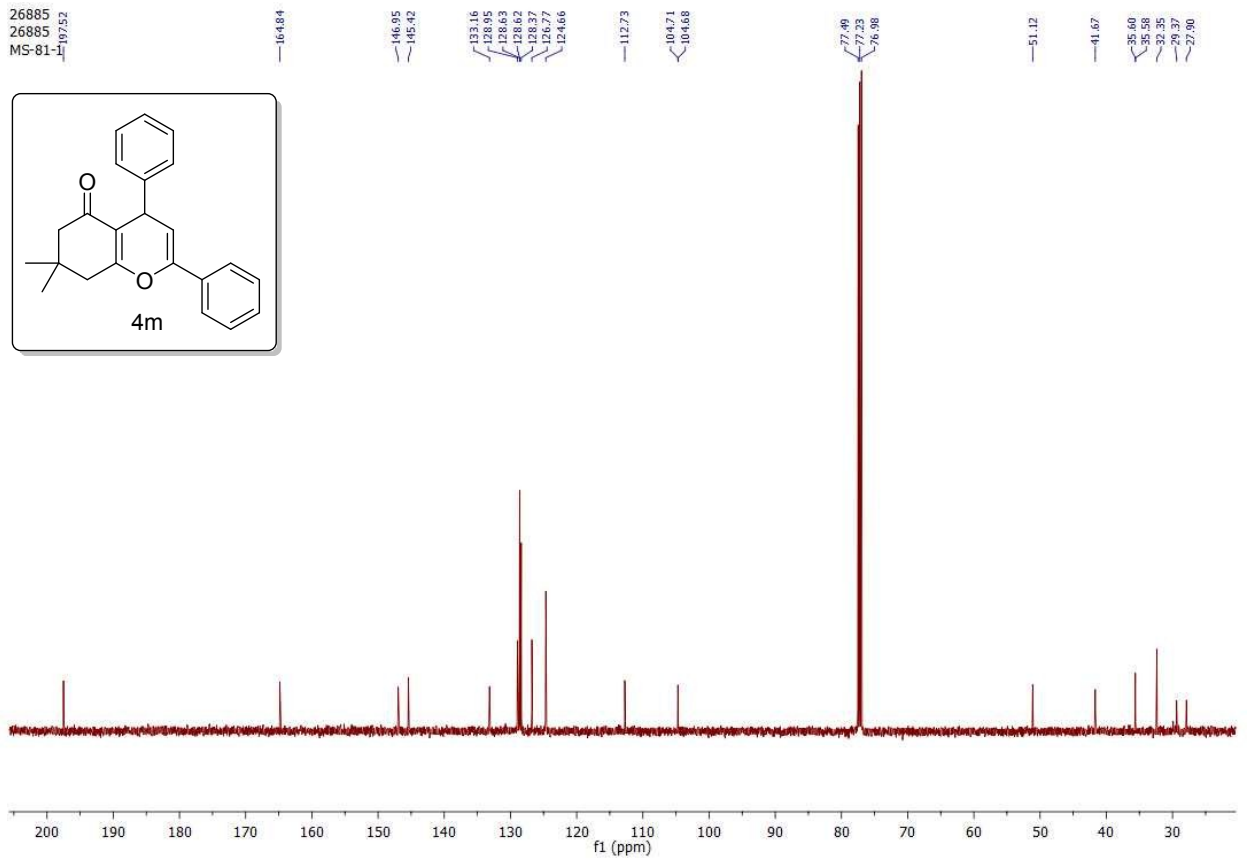

28004  
28004  
MS-81-6

7.610  
7.606  
7.593  
7.591  
7.423  
7.419  
7.413  
7.410  
7.406  
7.401  
7.396  
7.390  
7.381  
7.378  
7.366  
7.378  
7.235  
7.218

5.687  
5.677

4.402  
4.482

2.569  
2.313  
2.281  
2.247  
2.215

1.154  
1.073

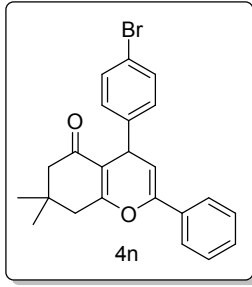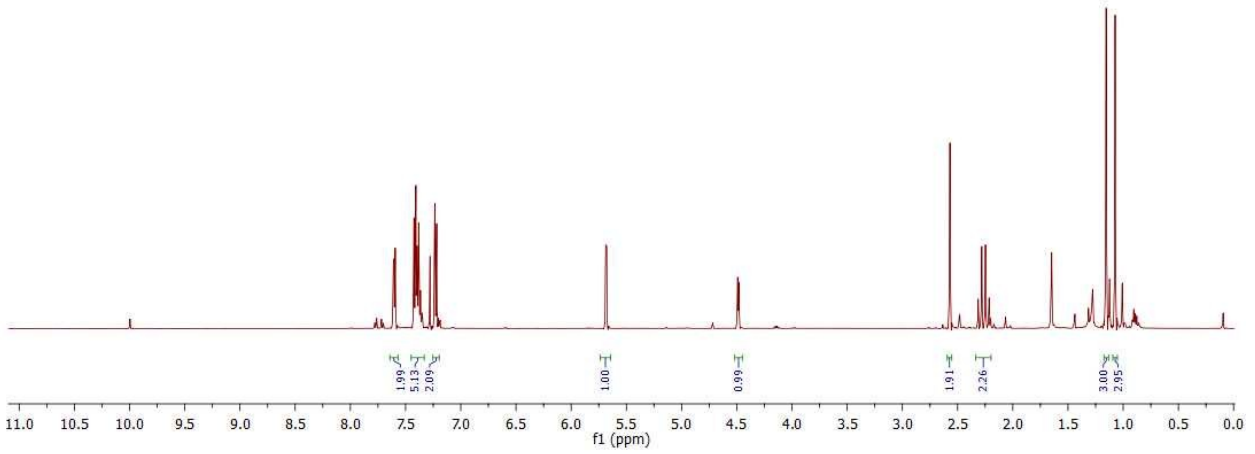

28005  
28005  
MS-81-6

197.45

164.96

147.31  
144.46

132.94  
131.68  
130.18  
128.75

124.69  
120.62

112.38

103.97

77.50  
77.25  
76.99

51.06

41.63

35.17

32.36

29.36

27.84

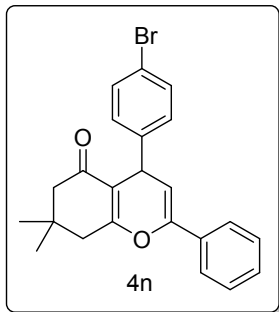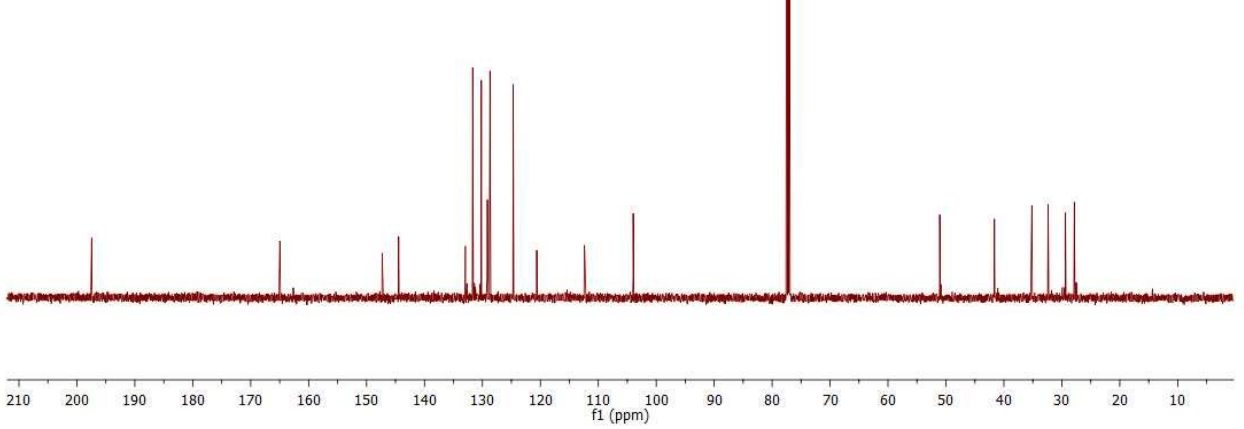

27268.1.fid  
27268  
MS-83-1

7.404  
7.387  
7.292  
7.281  
7.278  
7.275  
7.265  
7.262  
7.216  
7.211  
7.207  
7.181  
7.178  
7.174  
7.165  
7.162  
7.158

5.375  
5.367

3.604  
3.597  
3.589  
3.586  
3.578  
3.515  
3.308  
3.289  
3.281  
2.735  
2.717  
2.709  
2.691  
2.657  
2.652  
2.649  
2.646  
2.643  
2.637  
2.632  
2.523  
2.521  
2.518  
2.512  
2.508  
2.365

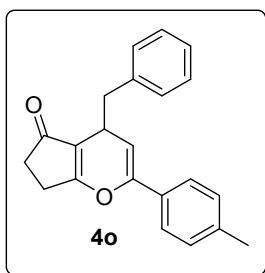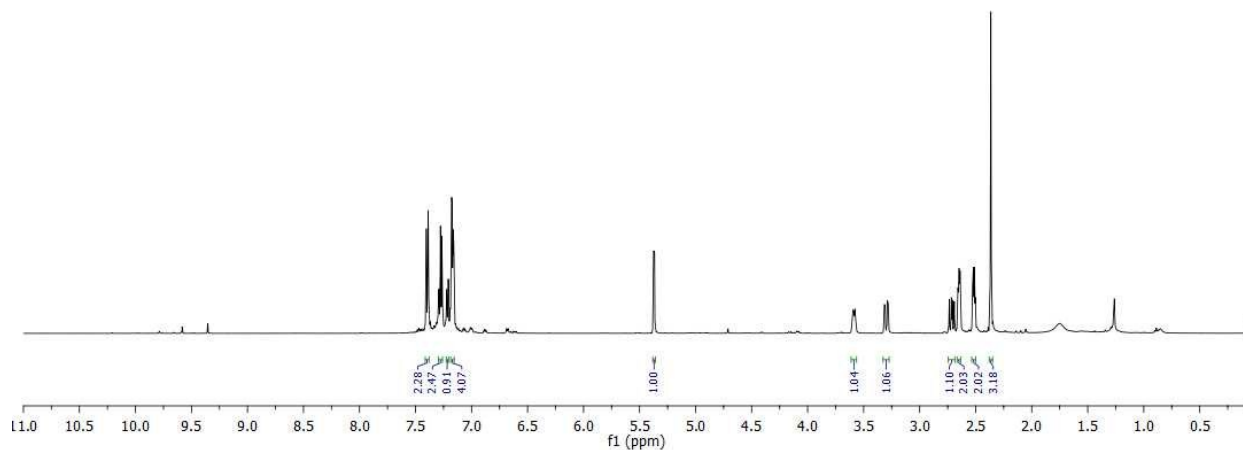

27269.5.fid  
27269  
MS-83-1

180.25

149.05

138.10

138.60

130.34

129.82

128.31

128.35

128.37

124.76

117.03

102.68

77.47

77.22

76.87

41.24

33.62

31.76

25.70

21.45

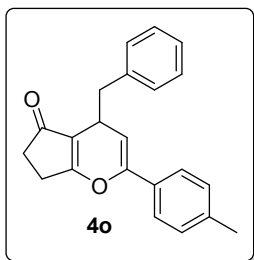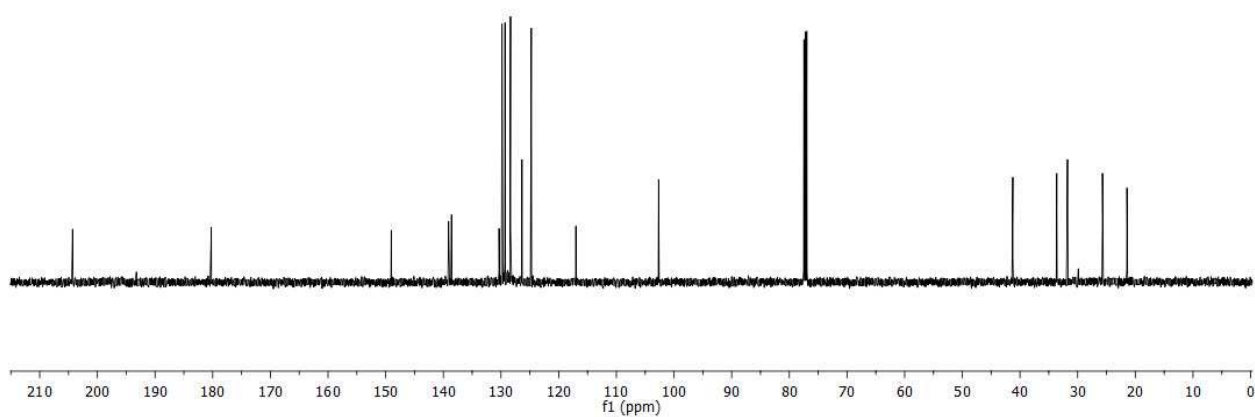

28033.1.fid  
28033  
MS-84-2

8.057  
8.054  
8.042  
8.038  
7.767  
7.764  
7.750  
7.475  
7.460  
7.451  
7.449  
7.435  
7.433  
7.371  
7.355  
7.341  
7.326  
5.878  
5.867  
4.743  
4.733

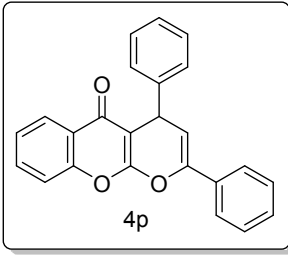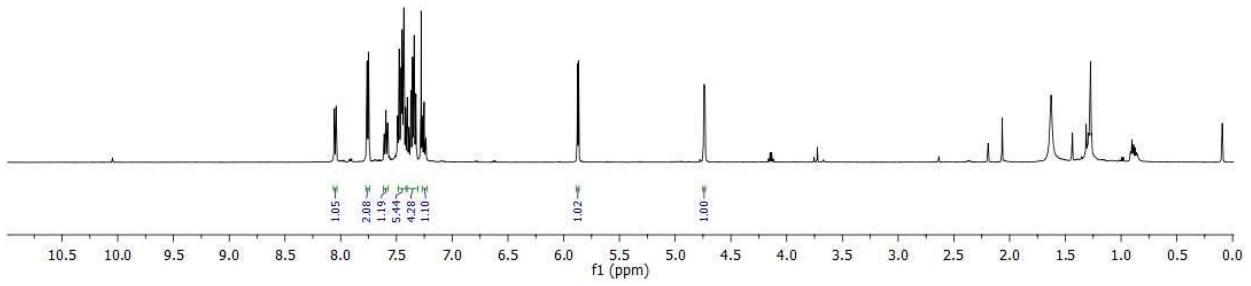

28034.1.fid  
28034  
MS-84-2

161.73  
155.99  
152.96  
147.09  
143.75  
132.22  
129.47  
128.89  
128.85  
128.69  
127.74  
124.89  
124.40  
122.80  
114.77  
103.96  
103.87  
77.40  
77.23  
76.98  
36.83

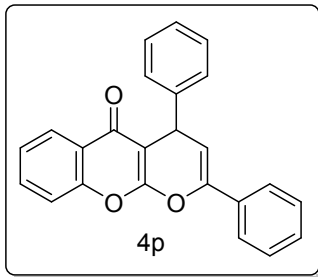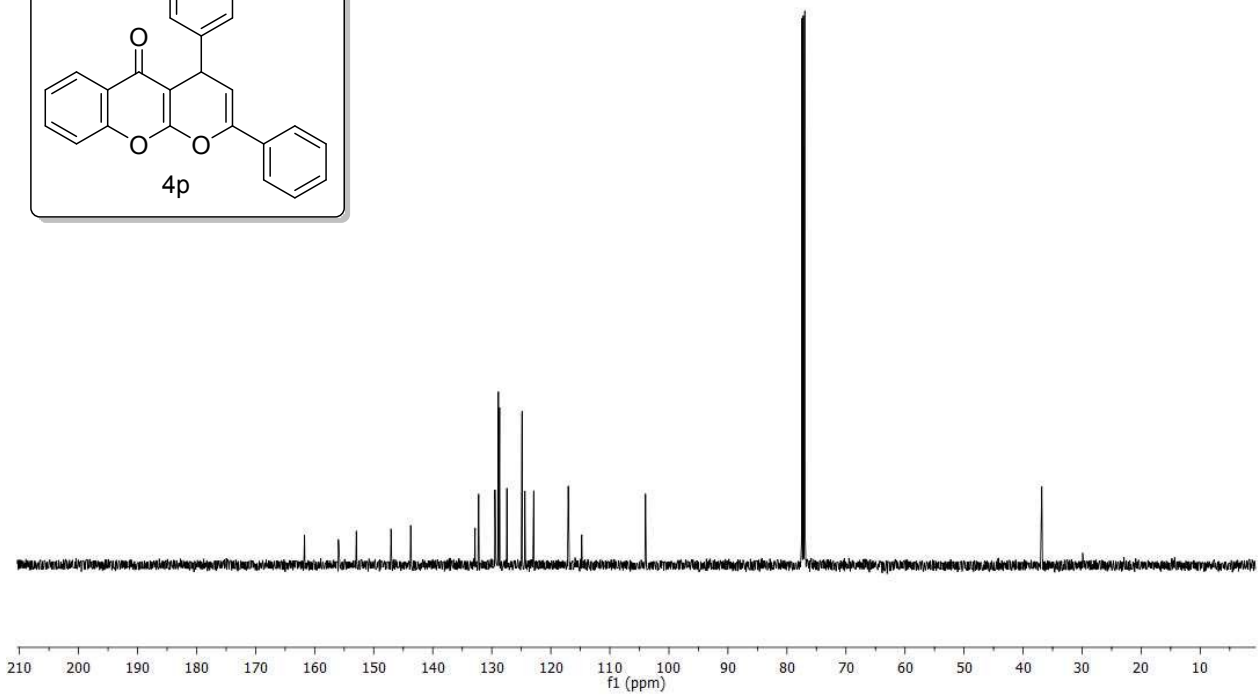

27463.1.fid  
27463  
MS-83-12

7.375, 7.368, 7.365, 7.336, 7.330, 7.327, 7.319, 7.264, 7.259, 7.248, 7.244, 7.234, 7.186, 7.183, 7.179, 7.172, 7.165, 7.167, 7.160, 7.158, 7.147, 7.143, 7.129, 4.989, 4.985, 4.962, 3.972, 3.968, 3.959, 3.952, 3.948, 3.946, 3.931, 2.612, 2.527, 2.524, 2.524, 2.512, 2.507, 2.484, 2.464, 2.464, 1.155, 1.144, 1.139, 1.119, 2.436, 2.426, 2.422, 2.404, 2.370, 2.315, 2.280, 2.245, 2.051, 2.042, 2.035, 2.026, 2.012, 2.006, 1.983, 1.960

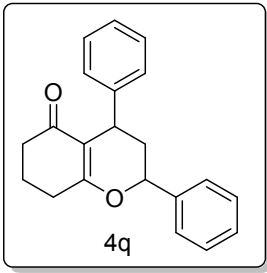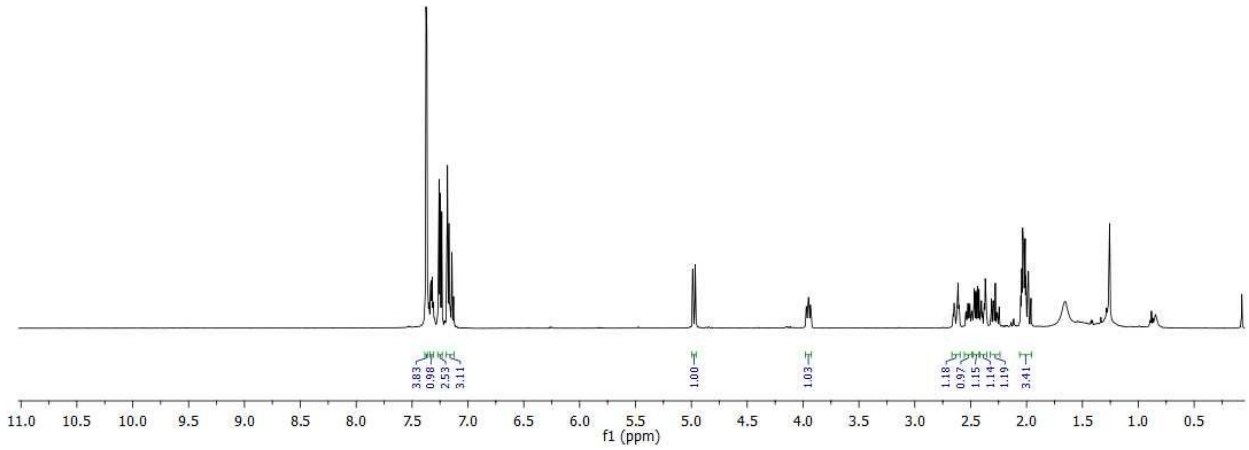

27464.1.fid  
27464  
MS-83-12

173.12, 144.95, 139.32, 128.51, 126.29, 126.03, 125.87, 115.53, 79.02, 77.17, 76.92, 76.66, 41.78, 36.91, 29.05, 20.10

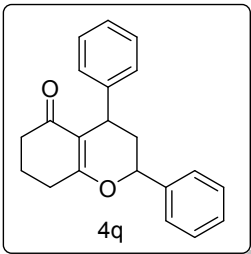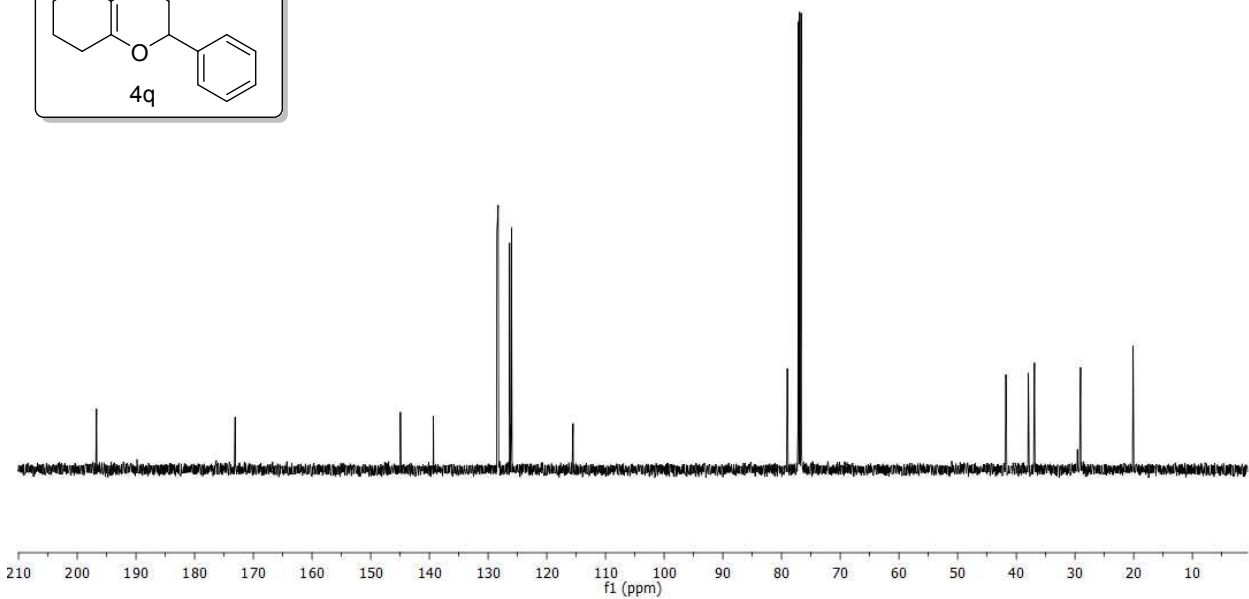

27558.1.fid  
27558  
MS-84-7

7.385  
7.296  
7.288  
7.285  
7.282  
7.249  
7.246  
7.232  
7.166  
7.152  
7.149  
7.130

4.970  
4.966  
4.947  
4.943

3.962  
3.957  
3.947  
3.941  
3.935  
3.925  
3.920

2.661  
2.655  
2.625  
2.466  
2.452  
2.437  
2.423  
2.419  
2.375  
2.373  
2.363  
2.353  
2.059  
2.051  
2.042  
2.036  
2.032  
2.029  
2.024  
1.989  
1.966  
1.960  
1.943  
1.937  
1.932

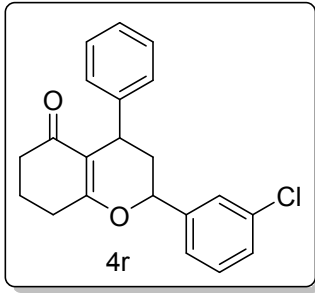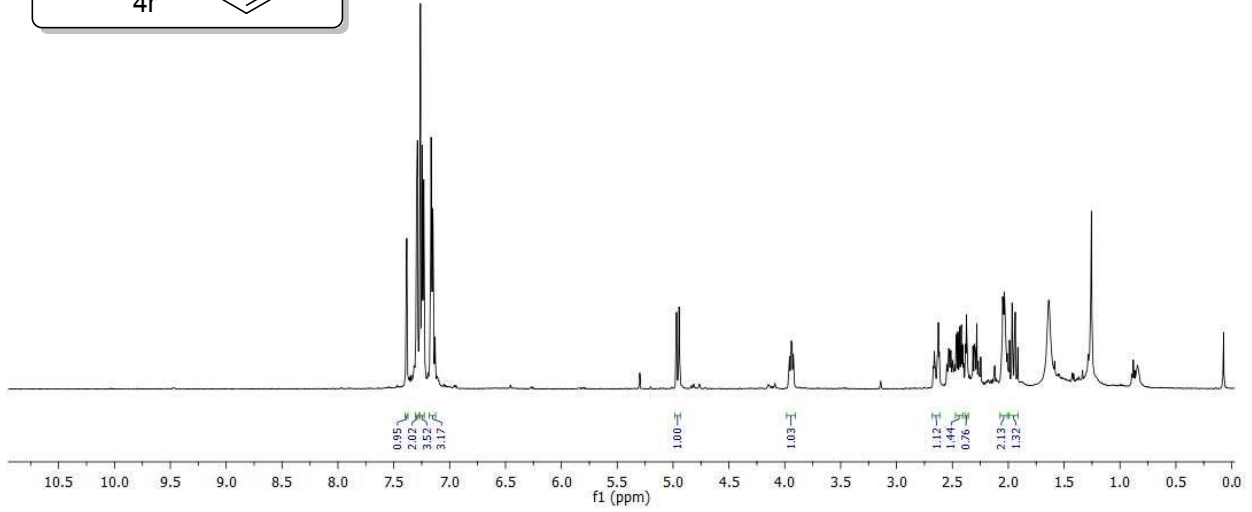

27559.1.fid  
27559  
MS-84-7

172.67

144.61  
141.59  
134.45  
129.78  
128.33  
126.32  
126.14  
125.88  
124.09  
115.59

78.08  
77.17  
77.13  
76.92  
76.67

41.71  
37.72  
36.88  
28.95  
20.08

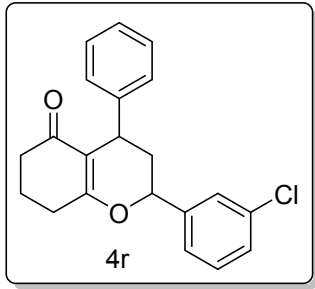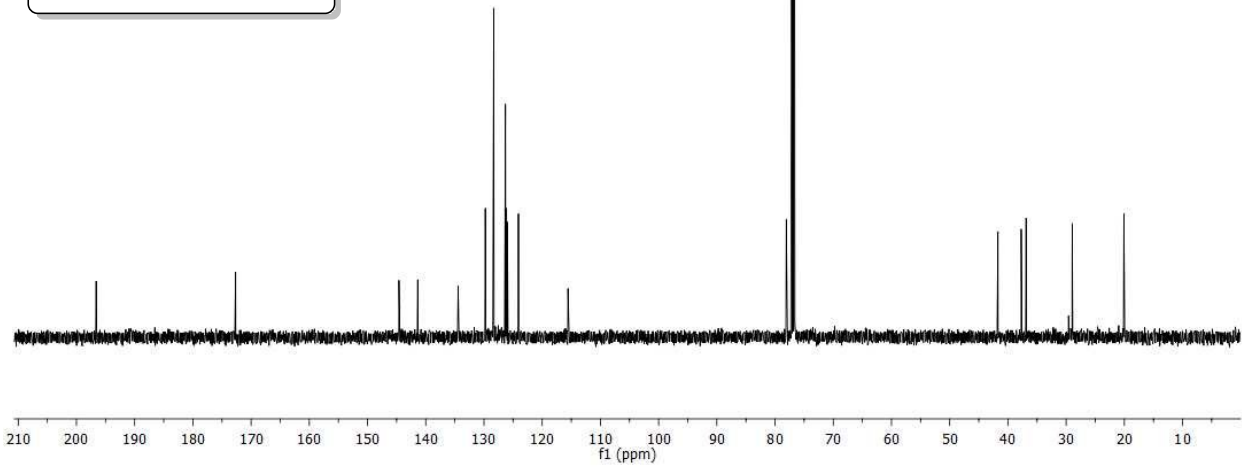

27634.1.fid  
27634  
MS-84-11

7.275  
7.272  
7.262  
7.258  
7.242  
7.194  
7.190  
7.187  
7.177  
7.174  
7.151

4.950  
4.929  
4.927

3.965  
3.962  
3.945  
3.939  
3.929  
3.925

2.633  
2.608  
2.598  
2.590  
2.447  
2.444  
2.433  
2.430  
2.419  
2.415  
2.405  
2.401  
2.349  
2.337  
2.312  
2.298  
2.293  
2.289  
2.277  
2.242  
2.240  
2.096  
2.094  
2.021  
2.016  
1.998  
1.993

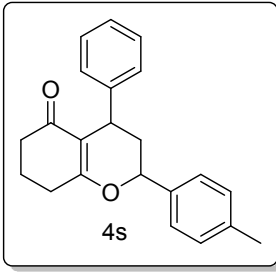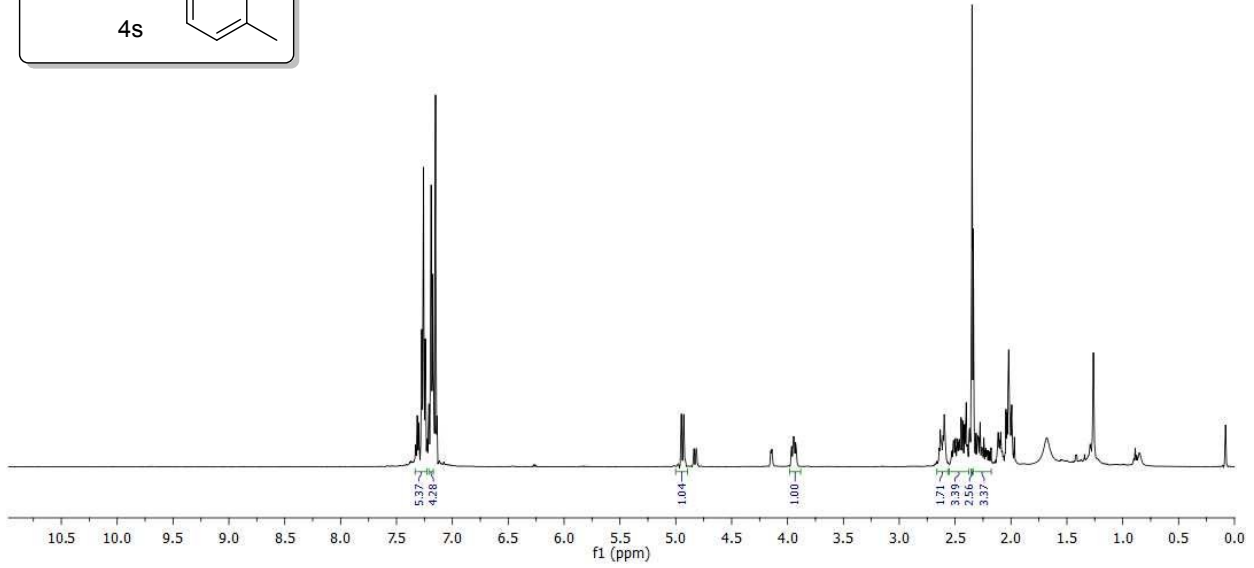

27635.1.fid  
27635  
MS-84-11

186.74

173.24

145.05

138.18

136.28

130.17

128.27

126.34

126.09

125.83

115.46

77.18

76.93

76.67

74.64

41.58

38.01

37.45

36.92

21.07

20.10

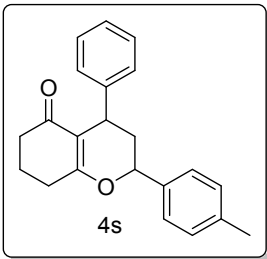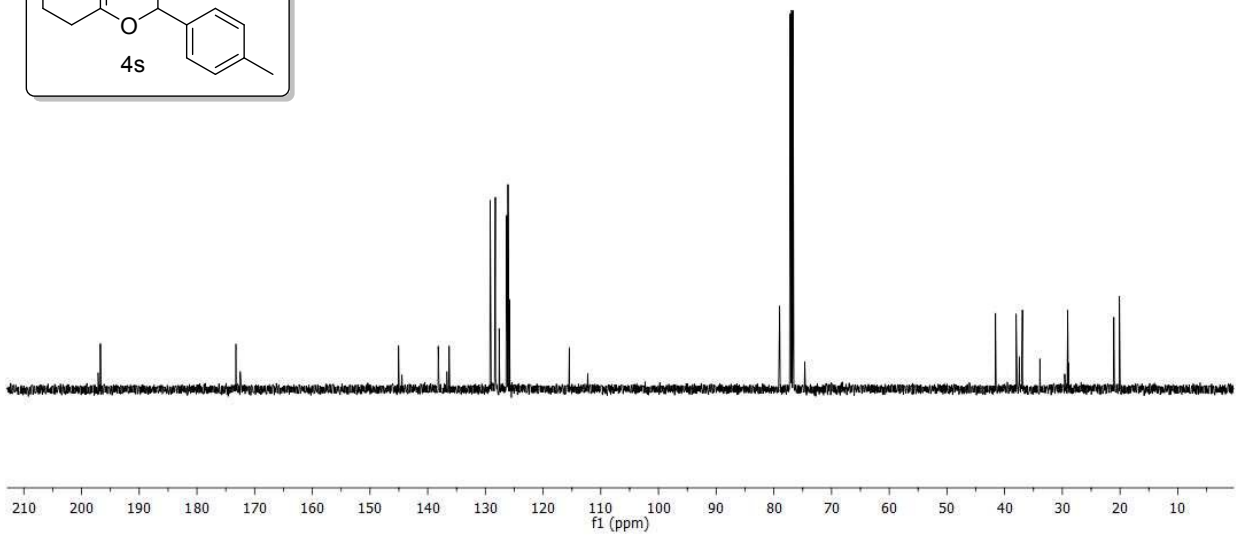



26888  
26888  
MS-81-3

7.617  
7.614  
7.607  
7.602  
7.398  
7.383  
7.362  
7.348

5.872

3.147  
3.127  
3.123  
3.109  
3.106  
3.085  
2.562  
2.468  
2.468  
2.454  
2.150  
2.119  
2.116  
2.107  
2.094  
2.061  
2.048  
2.034  
2.021  
2.015  
2.010  
1.875  
1.867  
1.855  
1.851  
1.843  
1.832

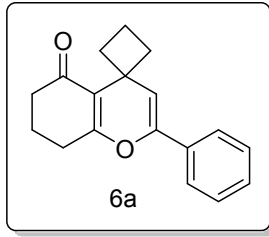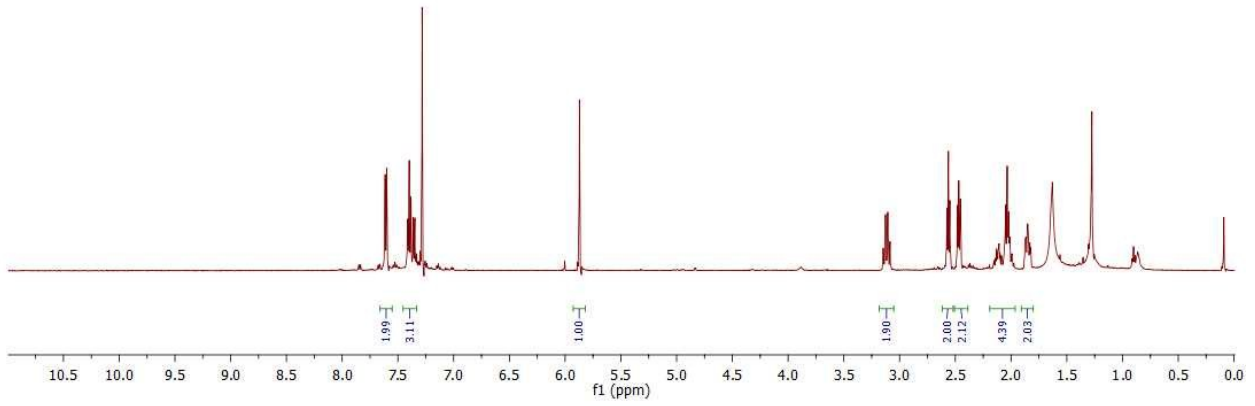

26889  
26889  
MS-81-3

199.20

166.34

143.78

133.28

128.65

128.60

124.45

115.69

111.33

77.48

76.97

39.00

36.01

35.05

28.40

20.67

14.20

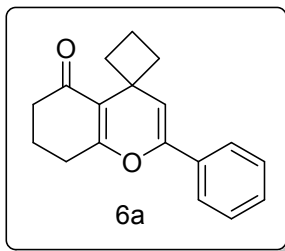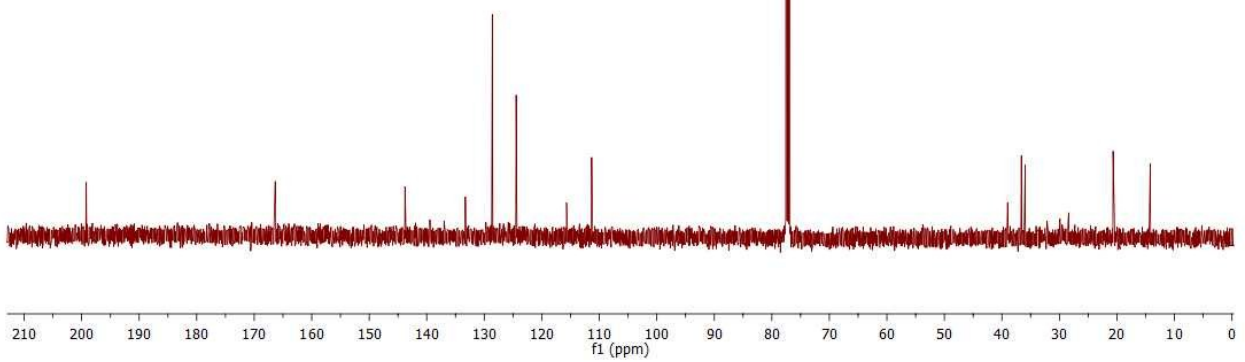

27178.1.fid  
27178  
MS-82-2

7.477  
7.460  
7.335  
7.182  
7.166

5.791

3.113  
3.096  
3.093  
3.089  
3.076  
3.072  
3.069  
3.055  
3.052  
2.527  
2.442  
2.363  
2.099  
2.076  
2.019  
2.013  
2.000  
1.987  
1.978  
1.842  
1.833  
1.823  
1.817  
1.811  
1.815  
1.812  
1.809  
1.798  
1.789

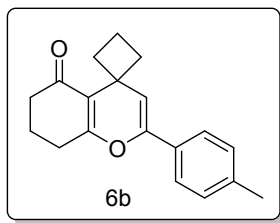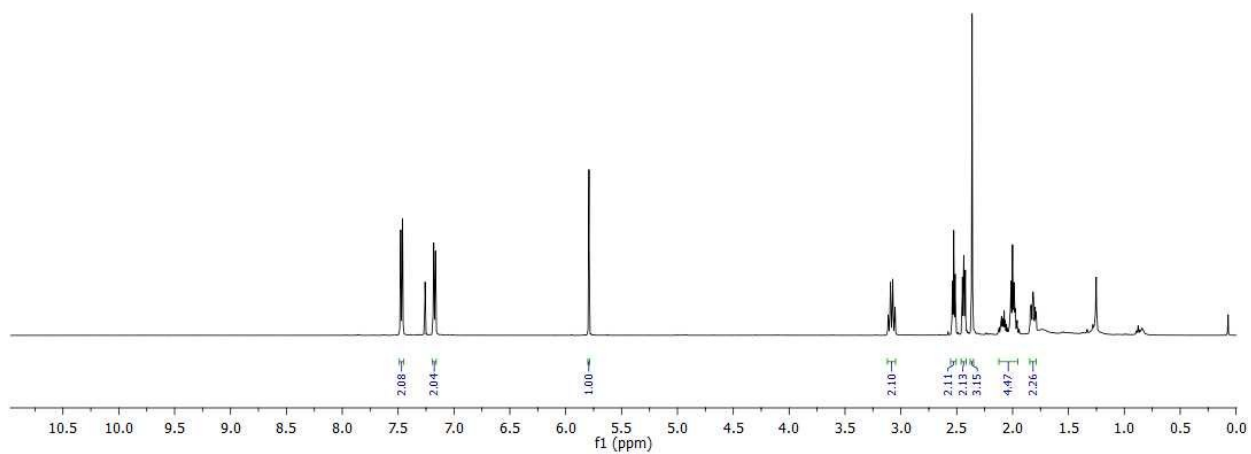

27179.5.fid  
27179  
MS-82-2

198.93

166.11

143.51

138.26

130.18

128.96

124.05

115.38

110.19

77.17

76.91

76.66

38.68

36.34

35.59

28.10

21.13

20.36

13.87

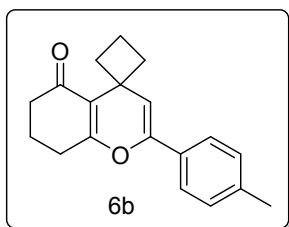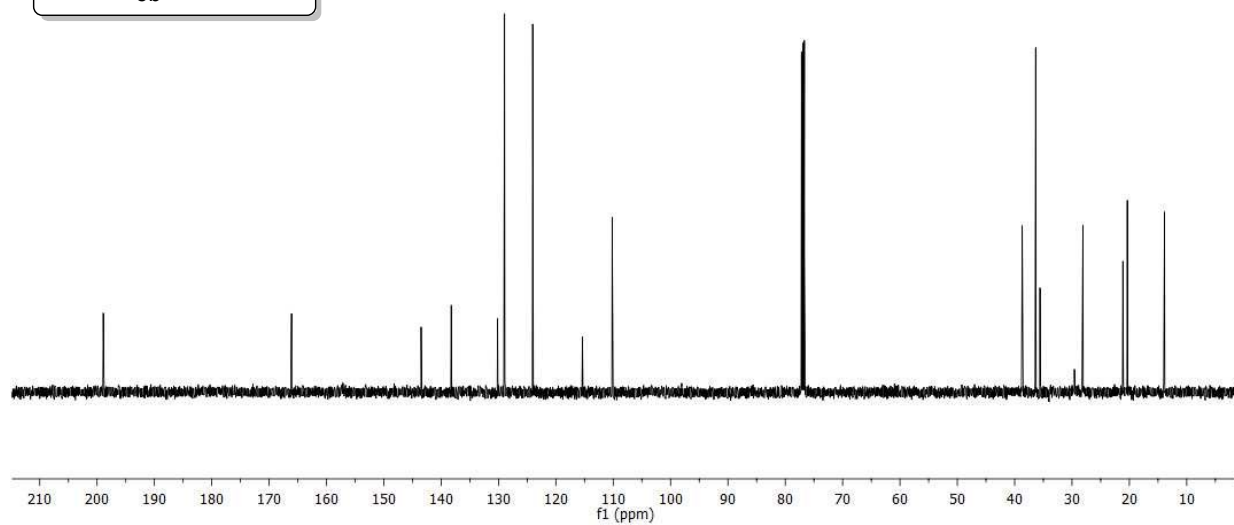

27109.1.fid  
27109  
MS-81-8

7.561  
7.558  
7.544  
7.542  
7.342  
7.338  
7.325  
7.310  
7.298  
7.295  
7.286  
7.281  
7.191

5.793

2.836  
2.818  
2.816  
2.798  
2.796  
2.777  
2.599  
2.594  
2.589  
2.583  
2.579  
2.440  
2.435  
2.429  
2.423  
2.420  
2.058  
2.044  
2.035  
1.983  
1.964  
1.946  
1.941  
1.880  
1.878  
1.872  
1.868  
1.865  
1.857  
1.848  
1.838  
1.828  
1.823

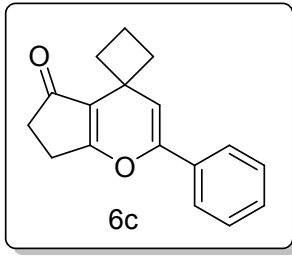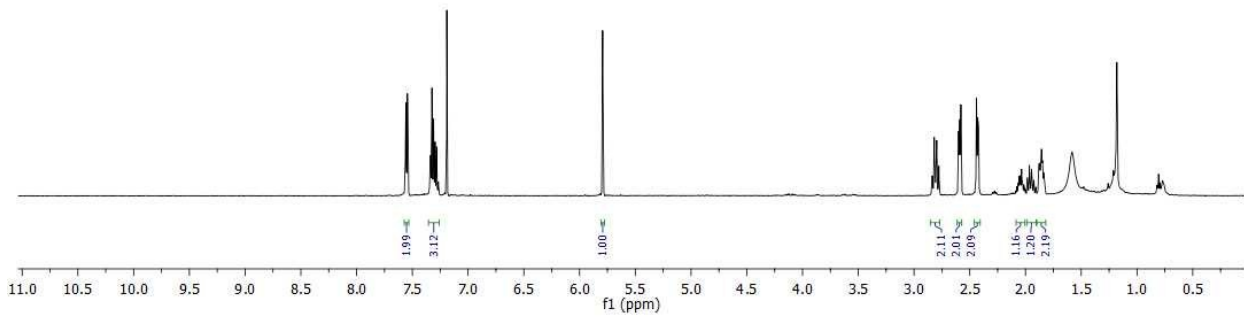

27110.1.fid  
27110  
MS-81-8

178.35

146.51

133.15

128.86

128.69

124.82

119.74

110.48

77.48

76.97

35.26

33.86

29.00

25.23

15.18

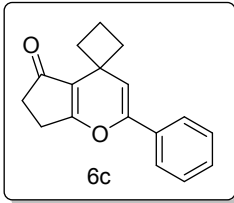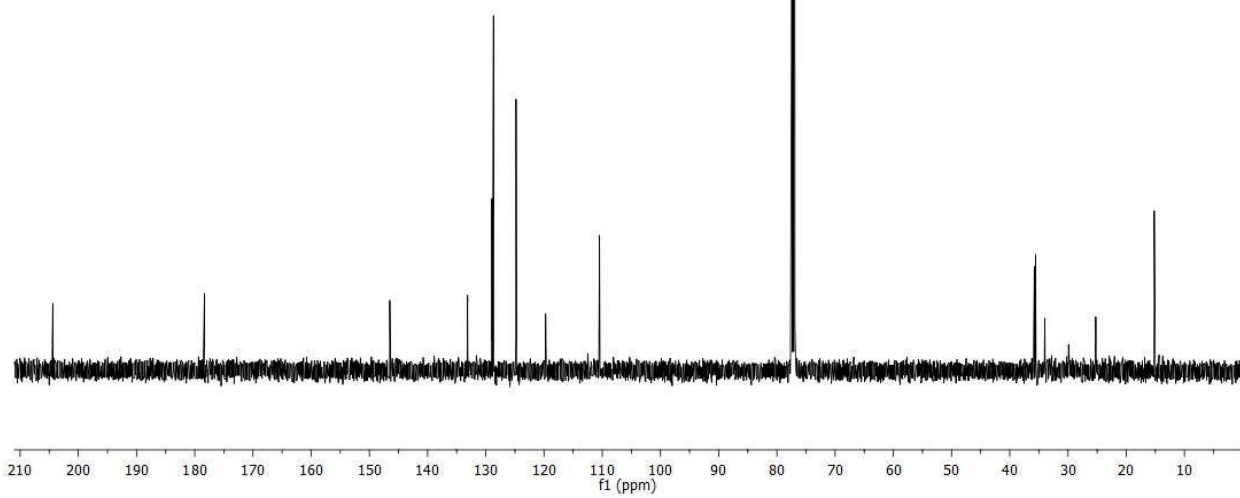

27271.1.fid  
27271  
MS-83-4

7.574  
7.564  
7.556  
7.550  
7.546  
7.265  
2.080  
2.063  
2.046

5.784

3.101  
3.098  
3.094  
3.082  
3.078  
3.074  
3.061  
3.057  
3.040  
3.037  
2.400  
2.312  
2.096  
2.091  
1.898  
1.837  
1.829  
1.825  
1.814

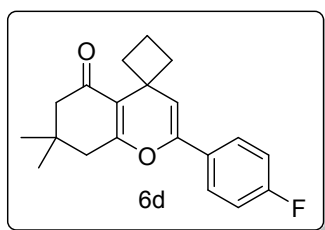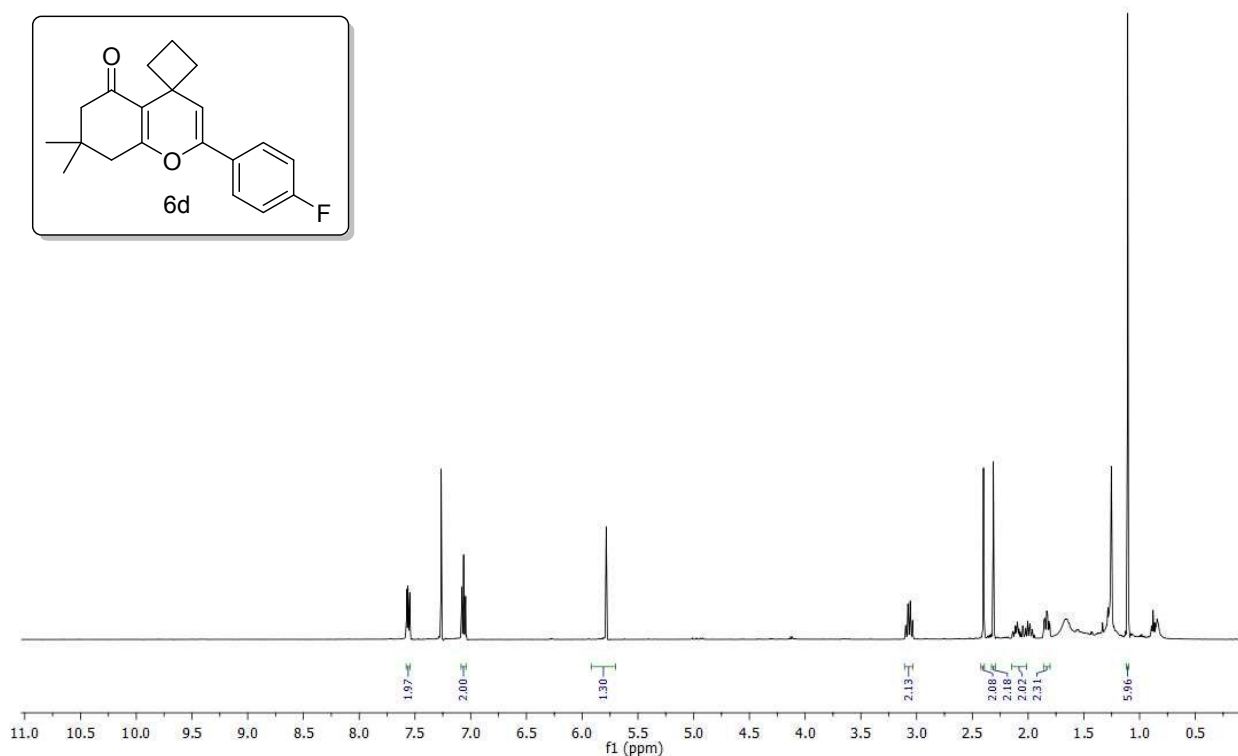

27272.5.fid  
27272  
MS-83-4

164.34  
163.96  
161.99

143.13

129.42  
126.31  
126.24

115.62  
115.46  
114.51  
110.98

77.45  
76.94

52.72

42.00

36.56  
35.71  
31.79  
28.40

14.18

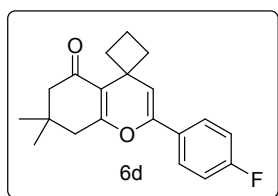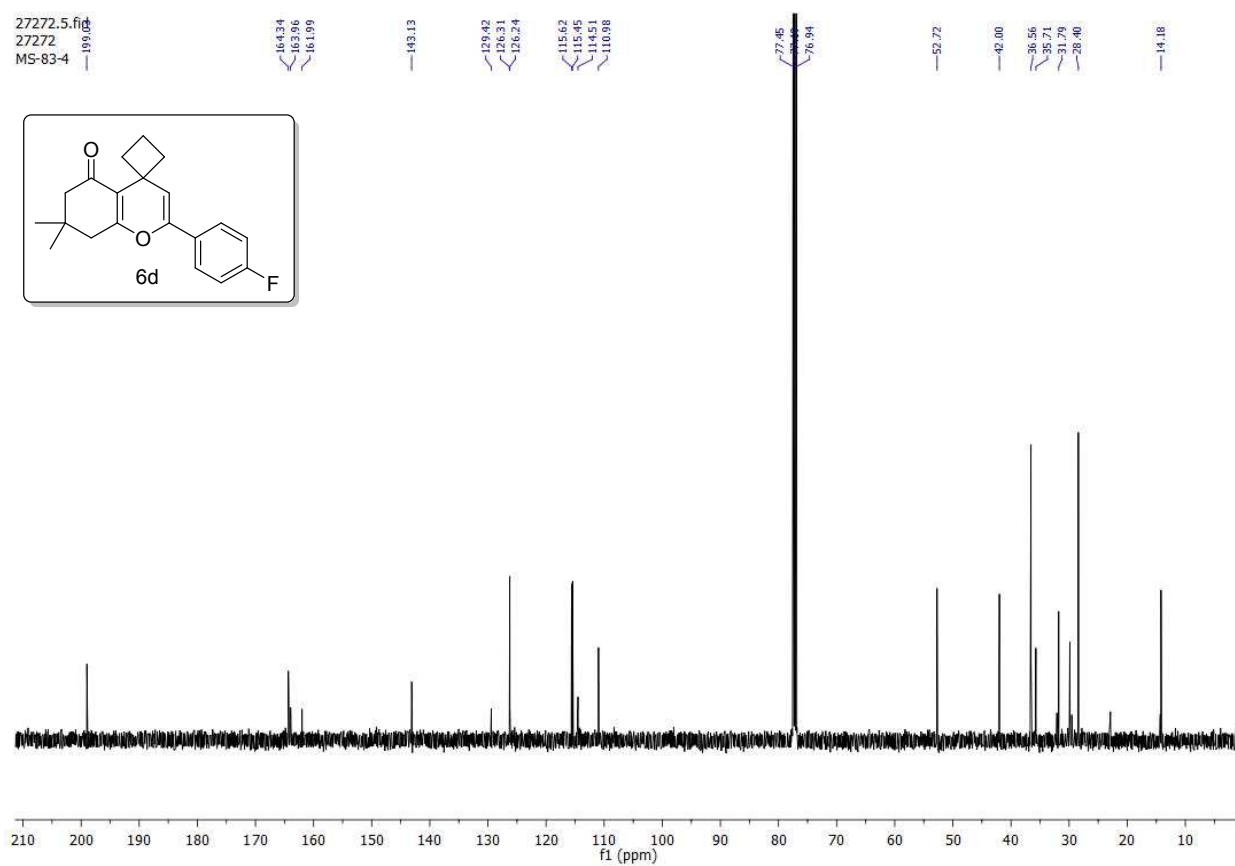

36439  
Name of Sample:MS-C6  
Spectrum No :36439

7.318  
7.316  
7.301  
7.145  
7.133  
7.130  
7.118  
7.115  
7.111  
7.100  
7.085  
7.082  
7.060  
7.046

4.845  
4.824

3.128  
3.108  
3.089  
3.069  
2.634  
2.615  
2.595  
2.241  
2.201  
2.175  
2.147  
1.960  
1.940  
1.889  
1.838  
1.715  
0.958  
0.937

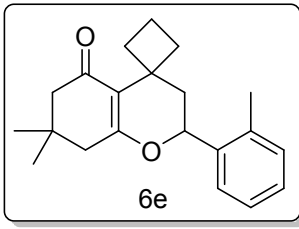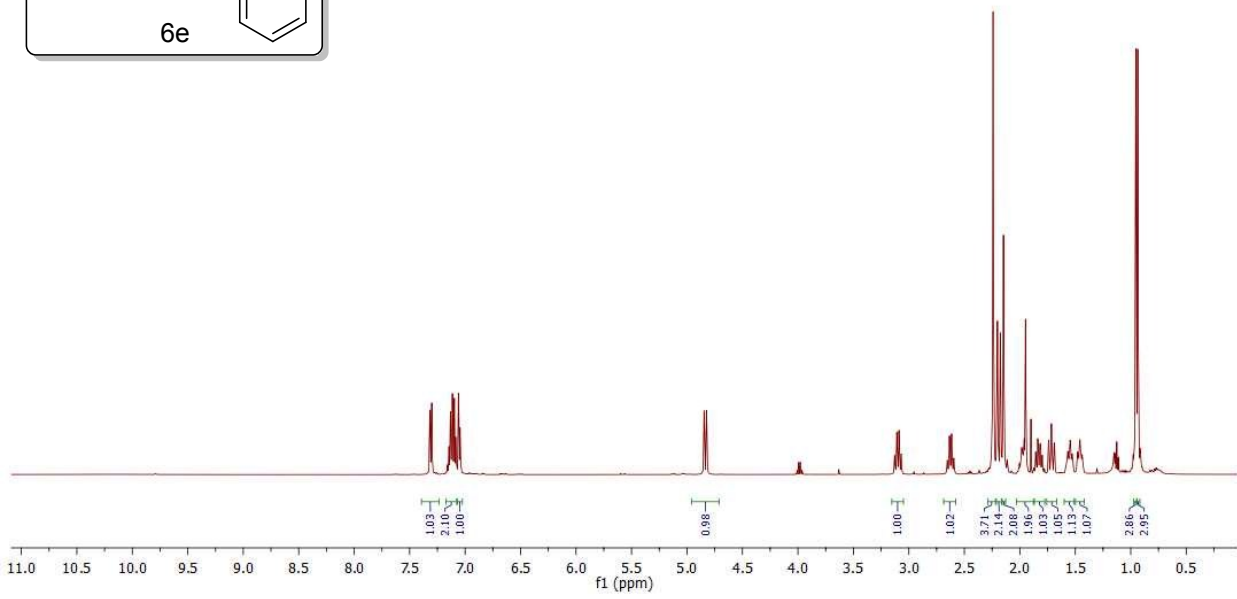

36440  
Name of Sample:MS-C6  
Spectrum No :36440

169.43

132.82  
134.45  
130.44  
127.83  
126.25  
125.40

115.95

77.47  
77.21  
76.86  
73.89

51.91

44.04  
42.61

36.21  
35.42  
31.17  
30.26  
29.44  
27.07

18.78

14.34

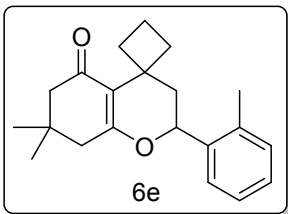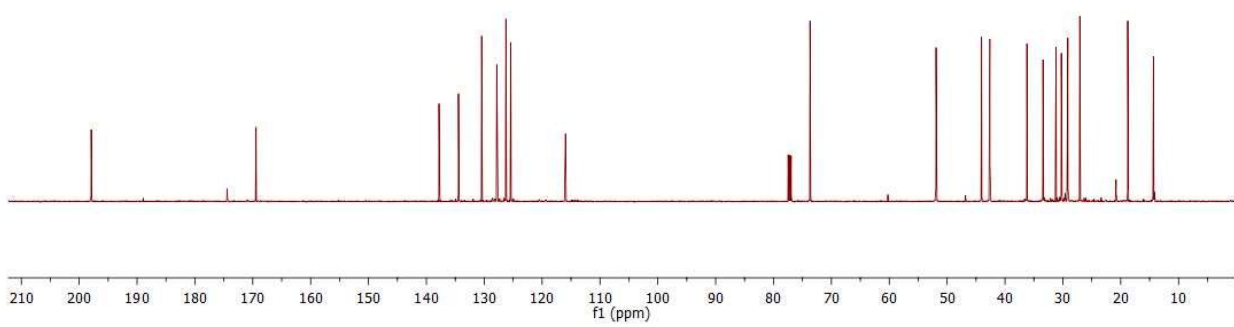

36576  
Name of Sample: CGB-75  
Spectrum No : 36576

7.417  
7.399  
7.193  
6.826  
6.808

5.244

3.756  
2.501  
2.488  
2.468  
2.376  
2.359  
2.339  
2.325  
2.241  
2.224  
2.212  
1.97  
2.209  
2.199  
2.183  
1.979  
1.967  
1.953  
1.939  
1.876  
1.864  
1.860  
1.858  
1.848  
1.647  
1.637

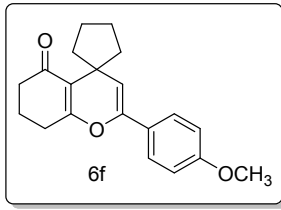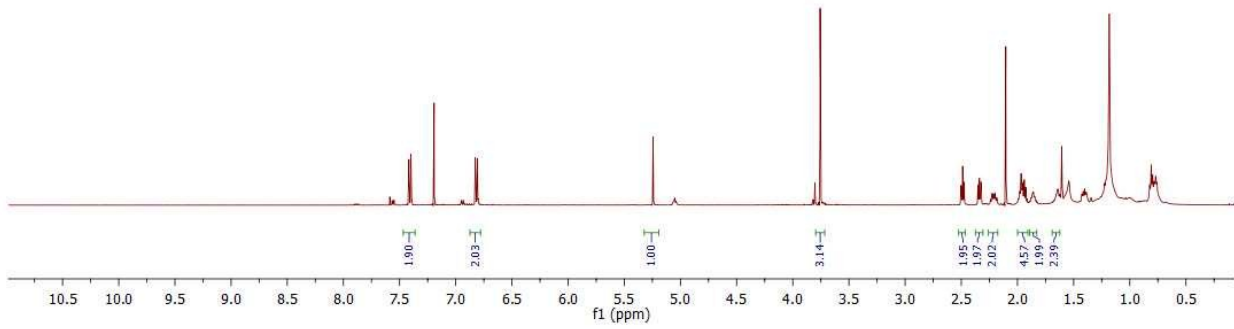

36577  
CGB-75  
36577

98.45

166.39

159.57

141.82

135.10

125.49

116.25

113.60

109.64

77.17  
76.91  
76.66

55.22

42.19

38.82

32.08

28.28

26.23

20.47

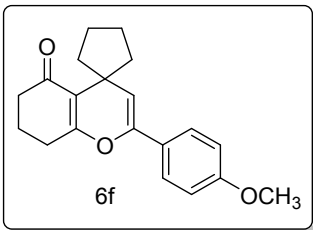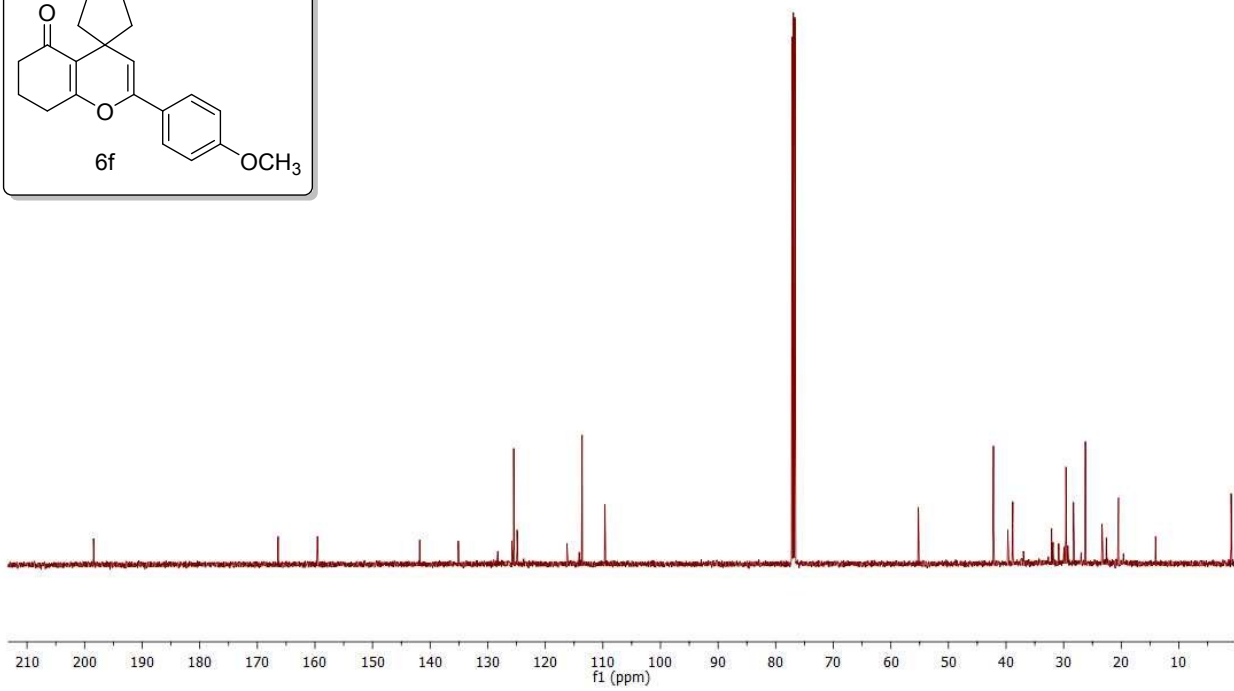

36562  
Name of Sample: MS-C2  
Spectrum No :36562

7.607  
7.603  
7.599  
7.587  
7.402  
7.388  
7.385  
7.376  
7.374  
7.359  
7.345  
7.264

5.495

2.693  
2.688  
2.683  
2.677  
2.673  
2.668  
2.663  
2.658  
2.654  
2.649  
2.644  
2.639  
2.634  
2.629  
2.624  
2.619  
2.614  
2.609  
2.604  
2.599  
2.594  
2.589  
2.584  
2.579  
2.574  
2.569  
2.564  
2.559  
2.554  
2.549  
2.544  
2.539  
2.534  
2.529  
2.524  
2.519  
2.514  
2.509  
2.504  
2.499  
2.494  
2.489  
2.484  
2.479  
2.474  
2.469  
2.464  
2.459  
2.454  
2.449  
2.444  
2.439  
2.434  
2.429  
2.424  
2.419  
2.414  
2.409  
2.404  
2.400

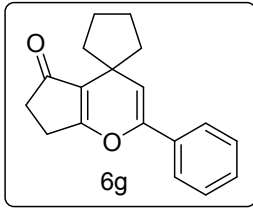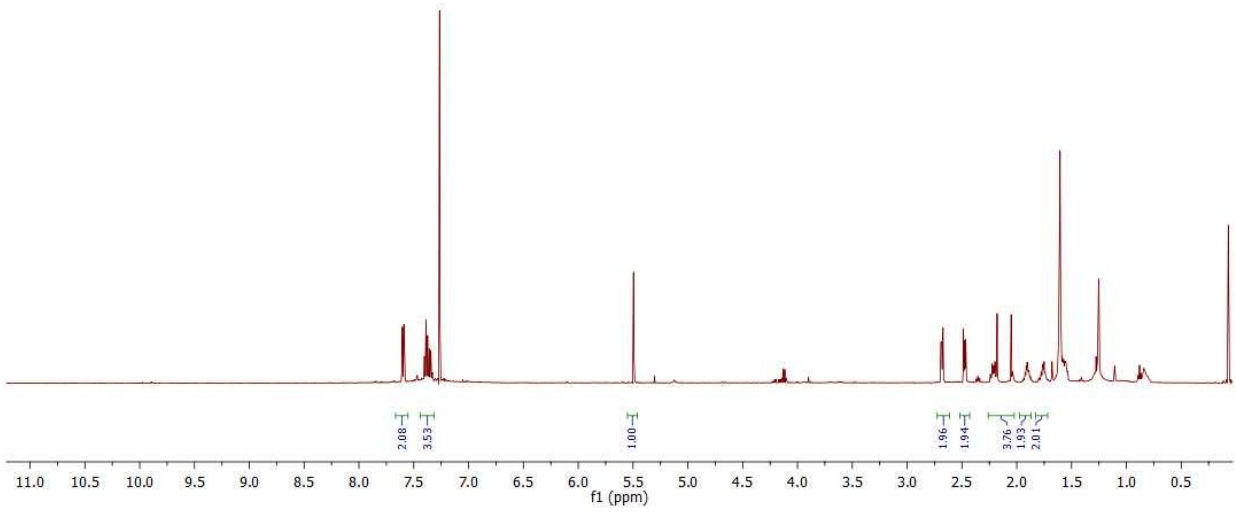

36563  
MS-C2  
36563

178.43

145.06

132.98

128.54

128.35

126.68

120.08

110.19

77.17

76.86

40.81

39.71

33.59

29.59

25.30

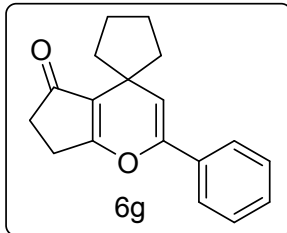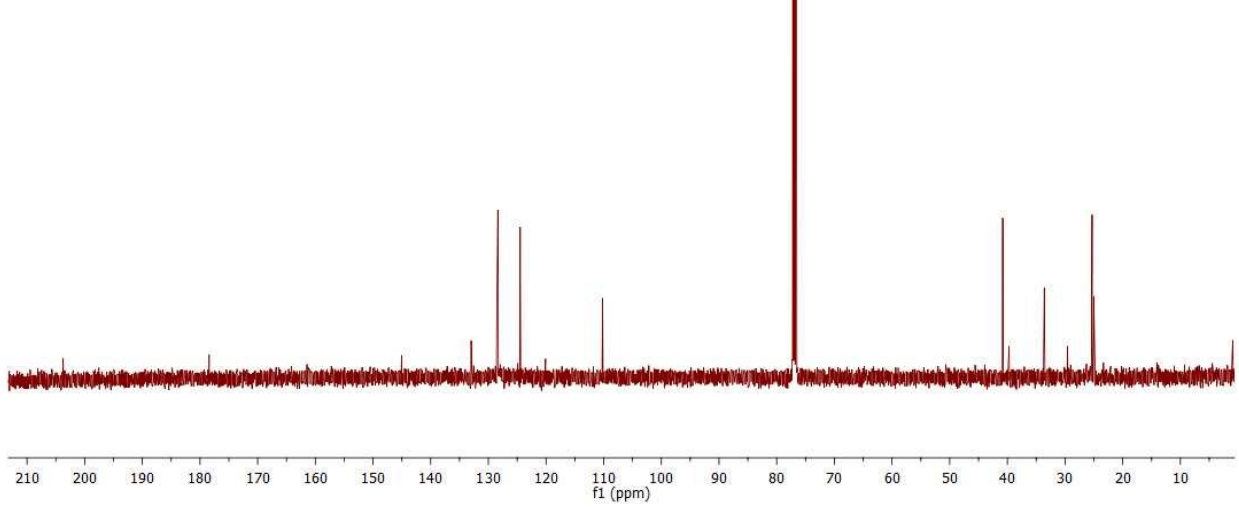

Supplement: d0ob00284d1.pdf [file d0ob00284d1.pdf]
